# Supplementary material for: Genotyping-by-sequencing provides the discriminating power to investigate the subspecies of Daucus carota (Apiaceae)
Source: PubMed Central journal article supplement (PMC5084430; doi:10.1186/s12862-016-0806-x), 2016-10-28

### Plant Height (cm)

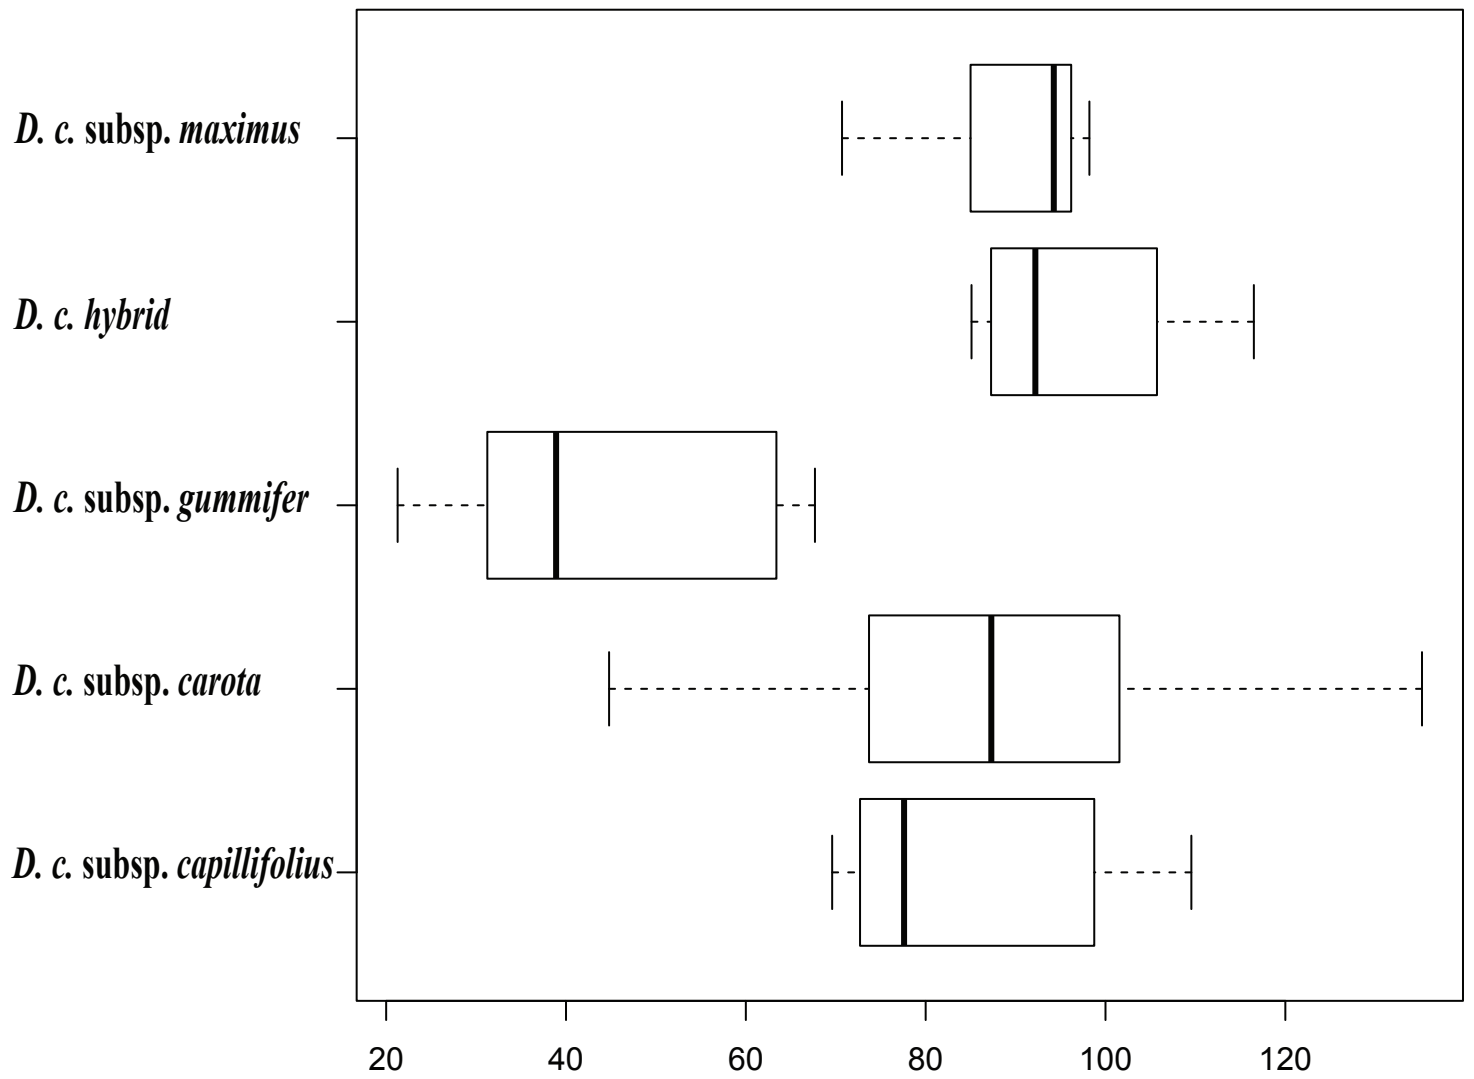

### Stem Diameter (mm)

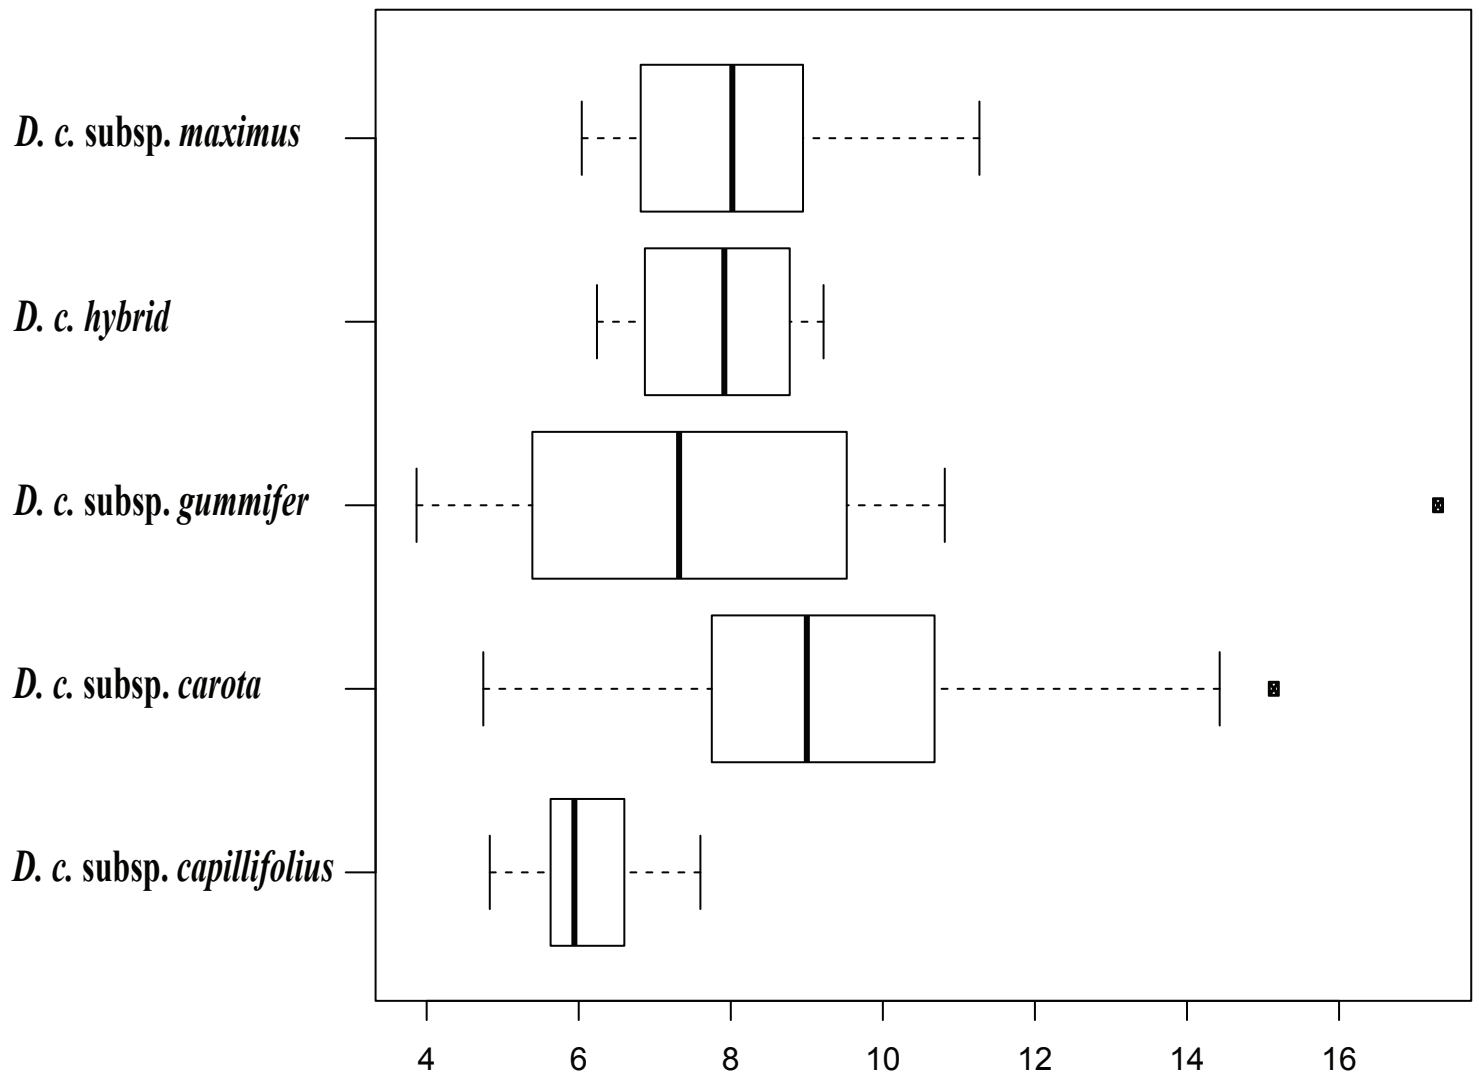

### Leaf Length (cm)

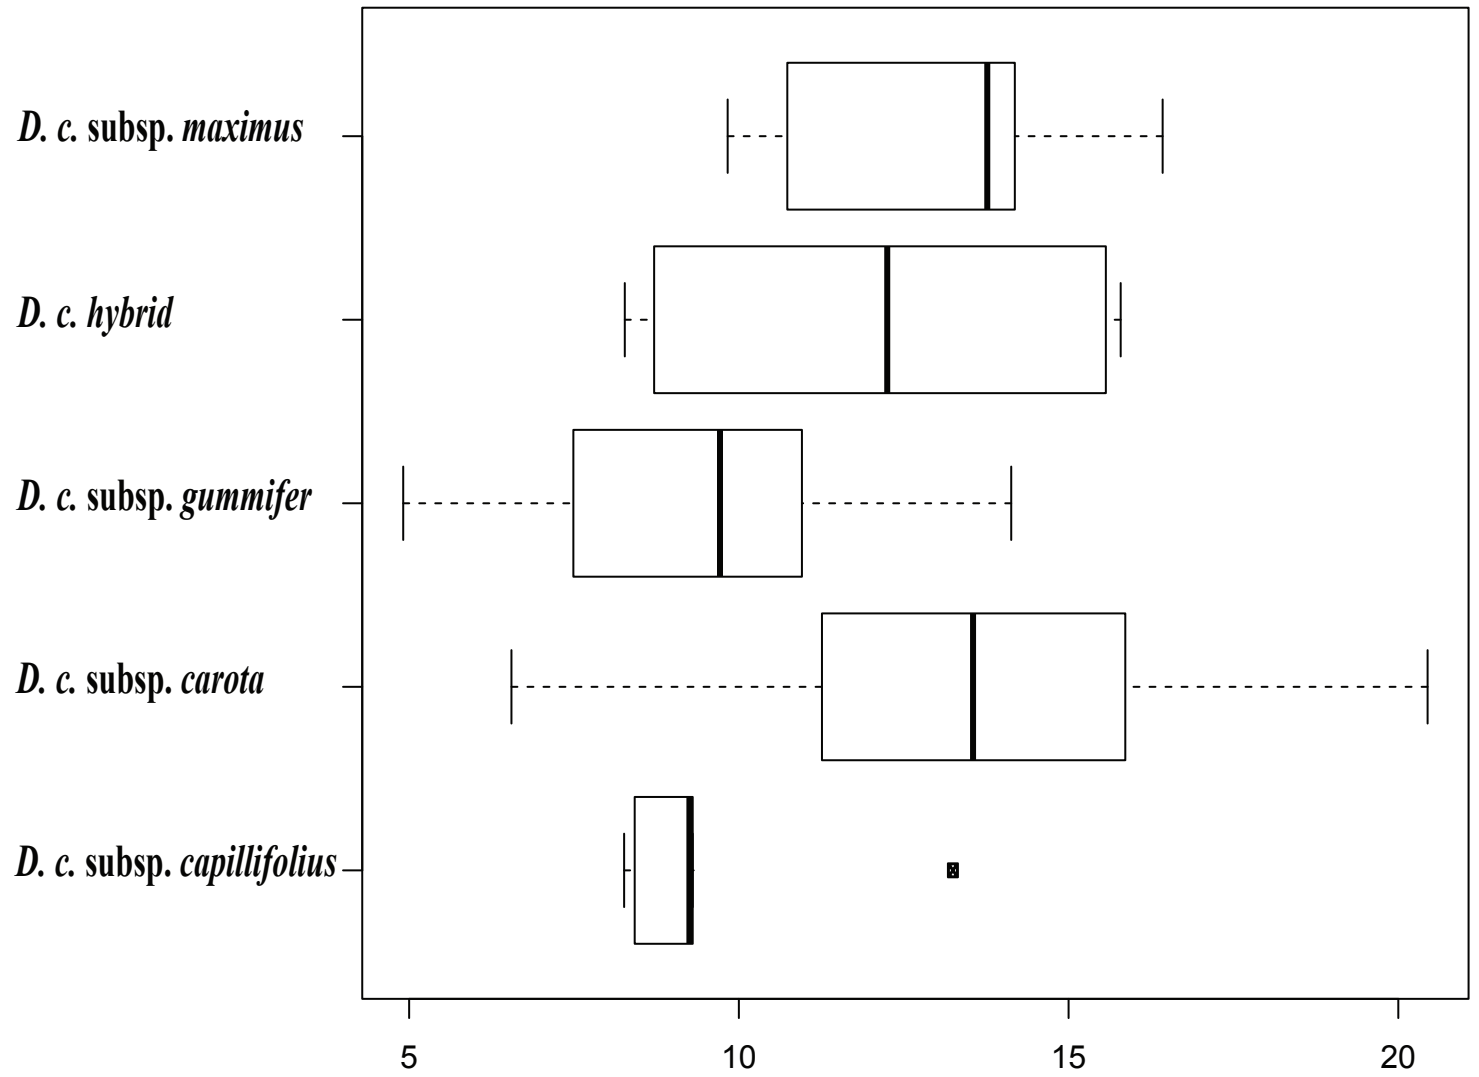

### Leaf Width (cm)

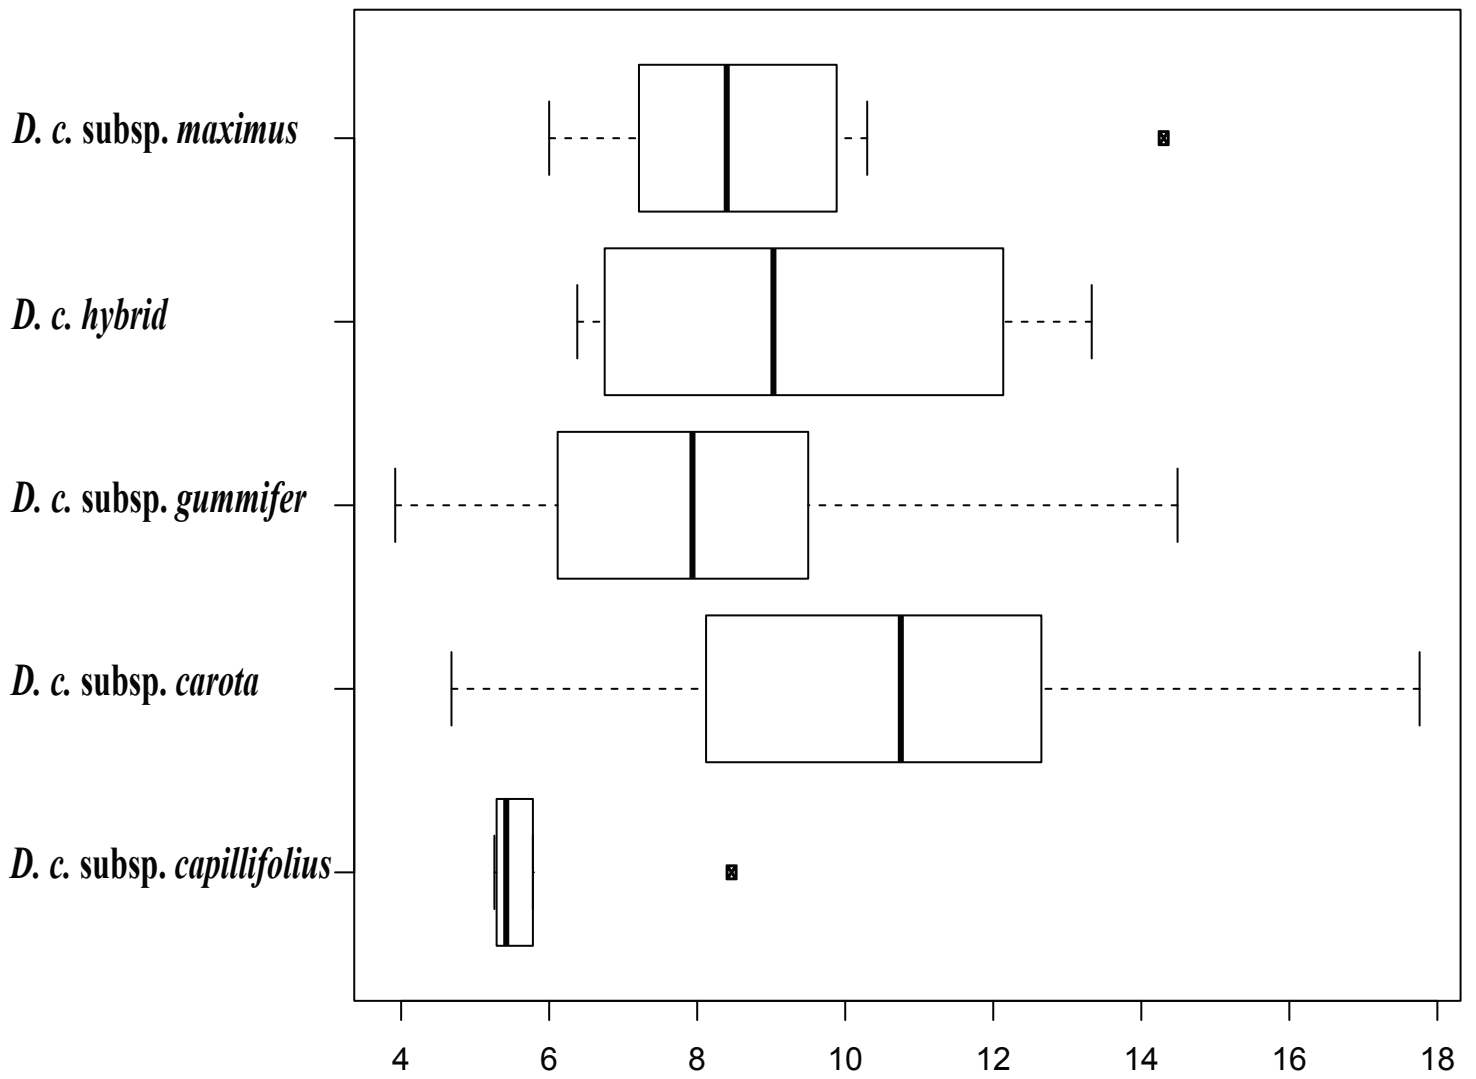

### Leaf-sheath Width (mm)

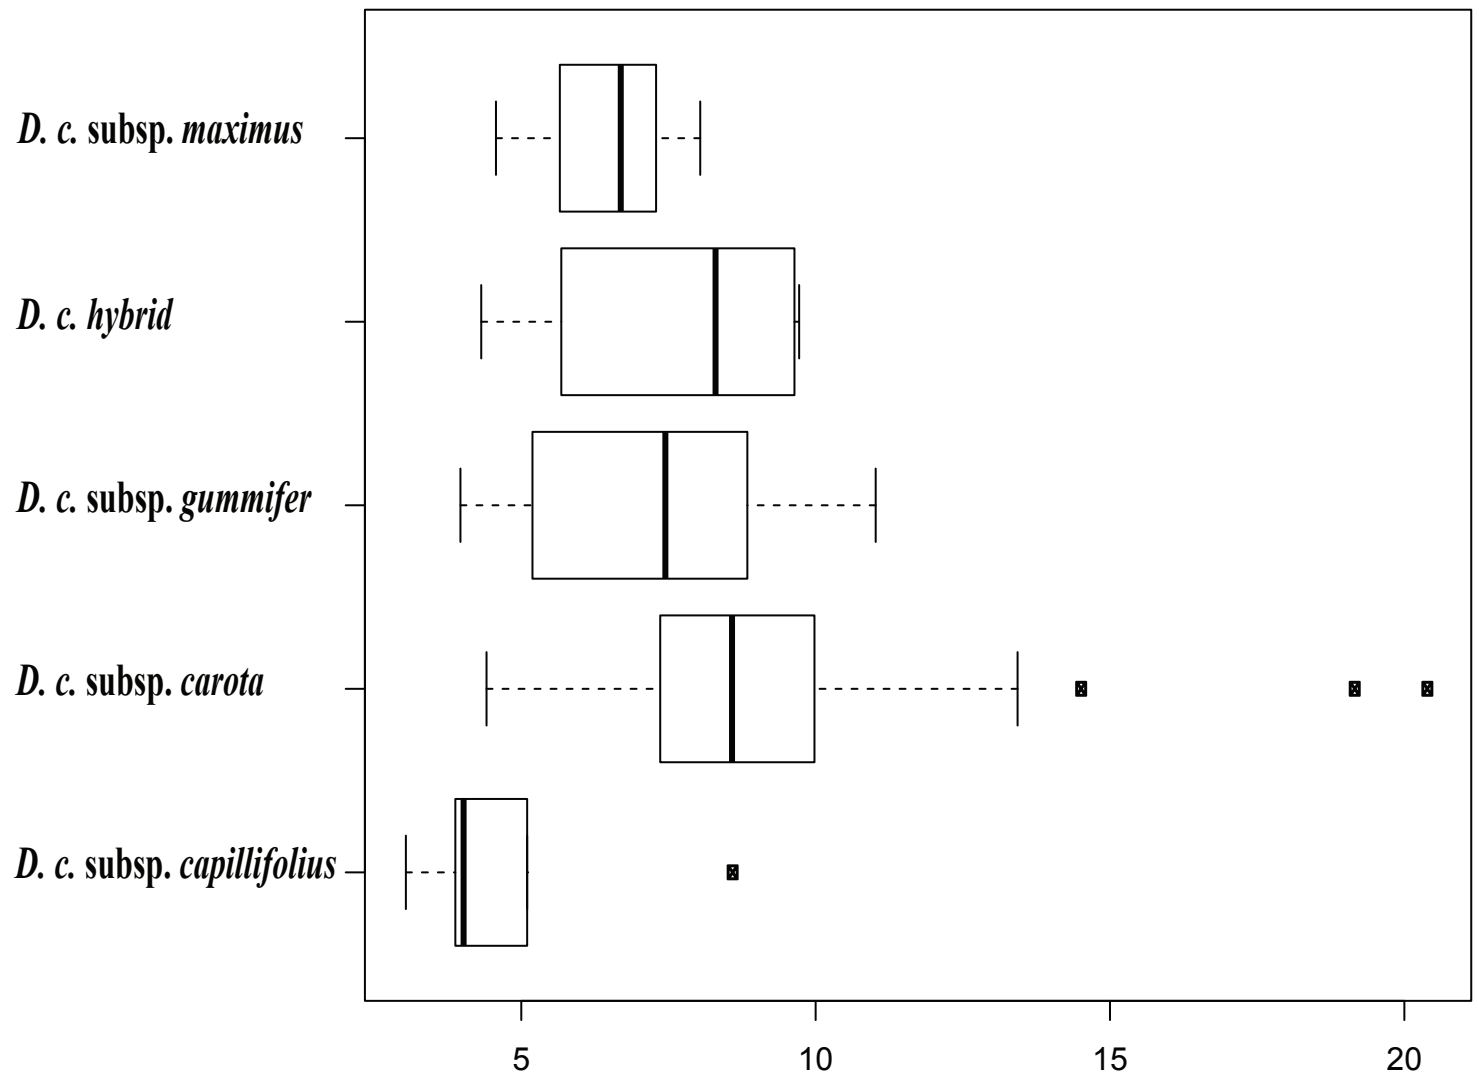

### Petiole Length (cm)

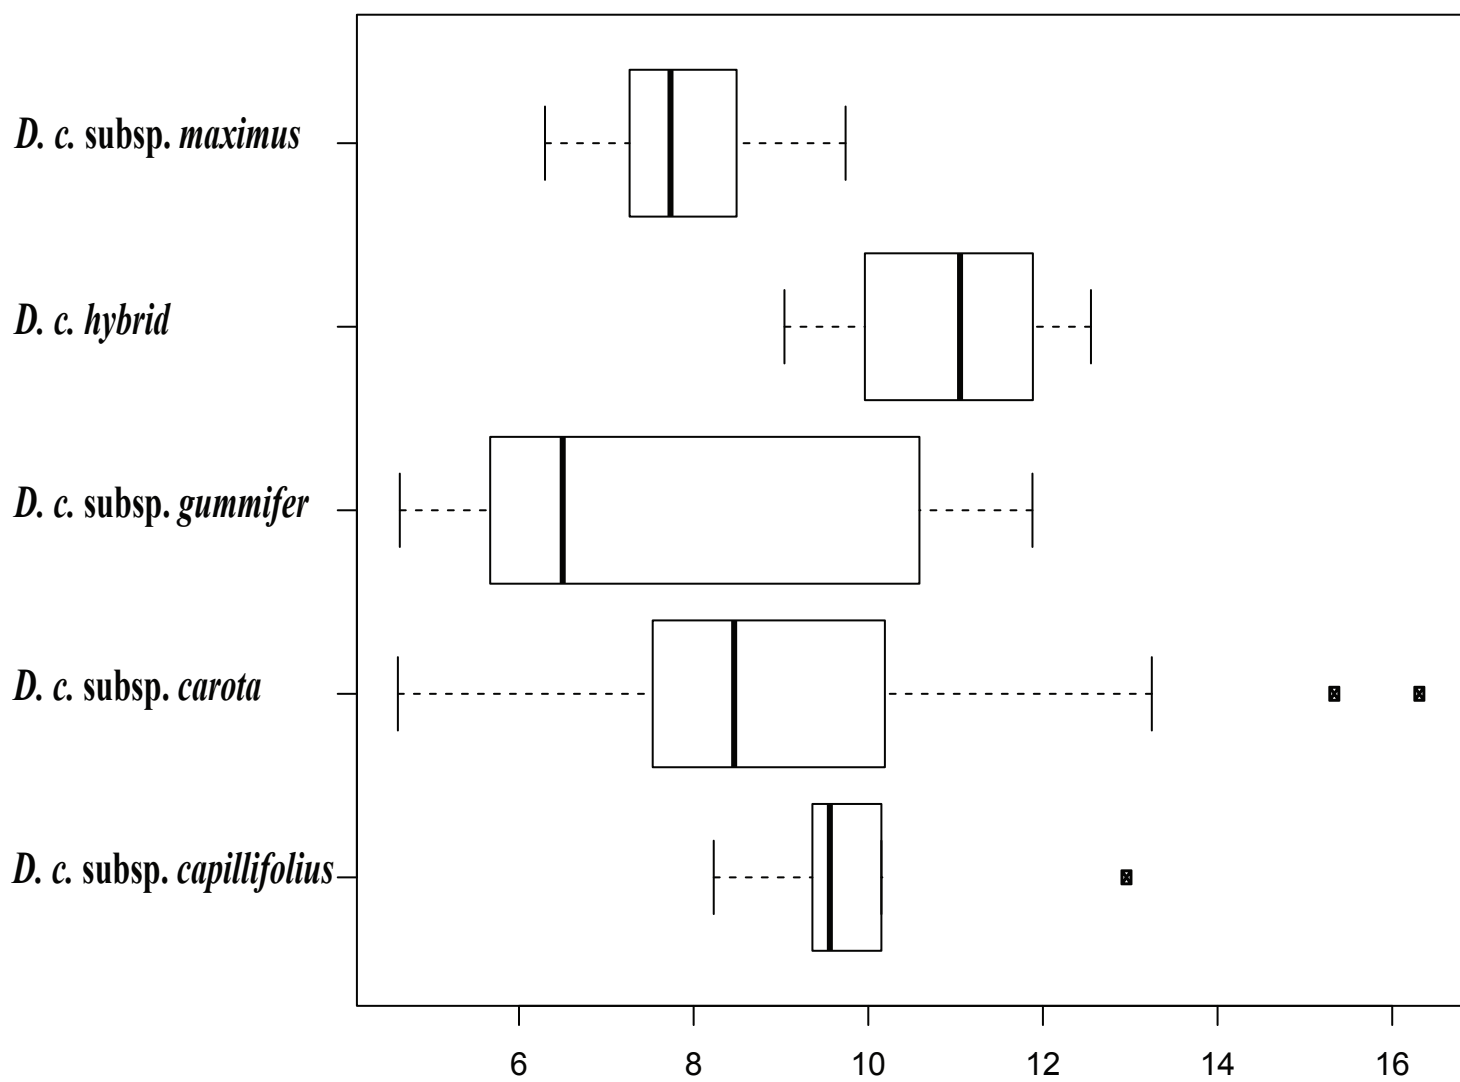

### Petiole Diameter (mm)

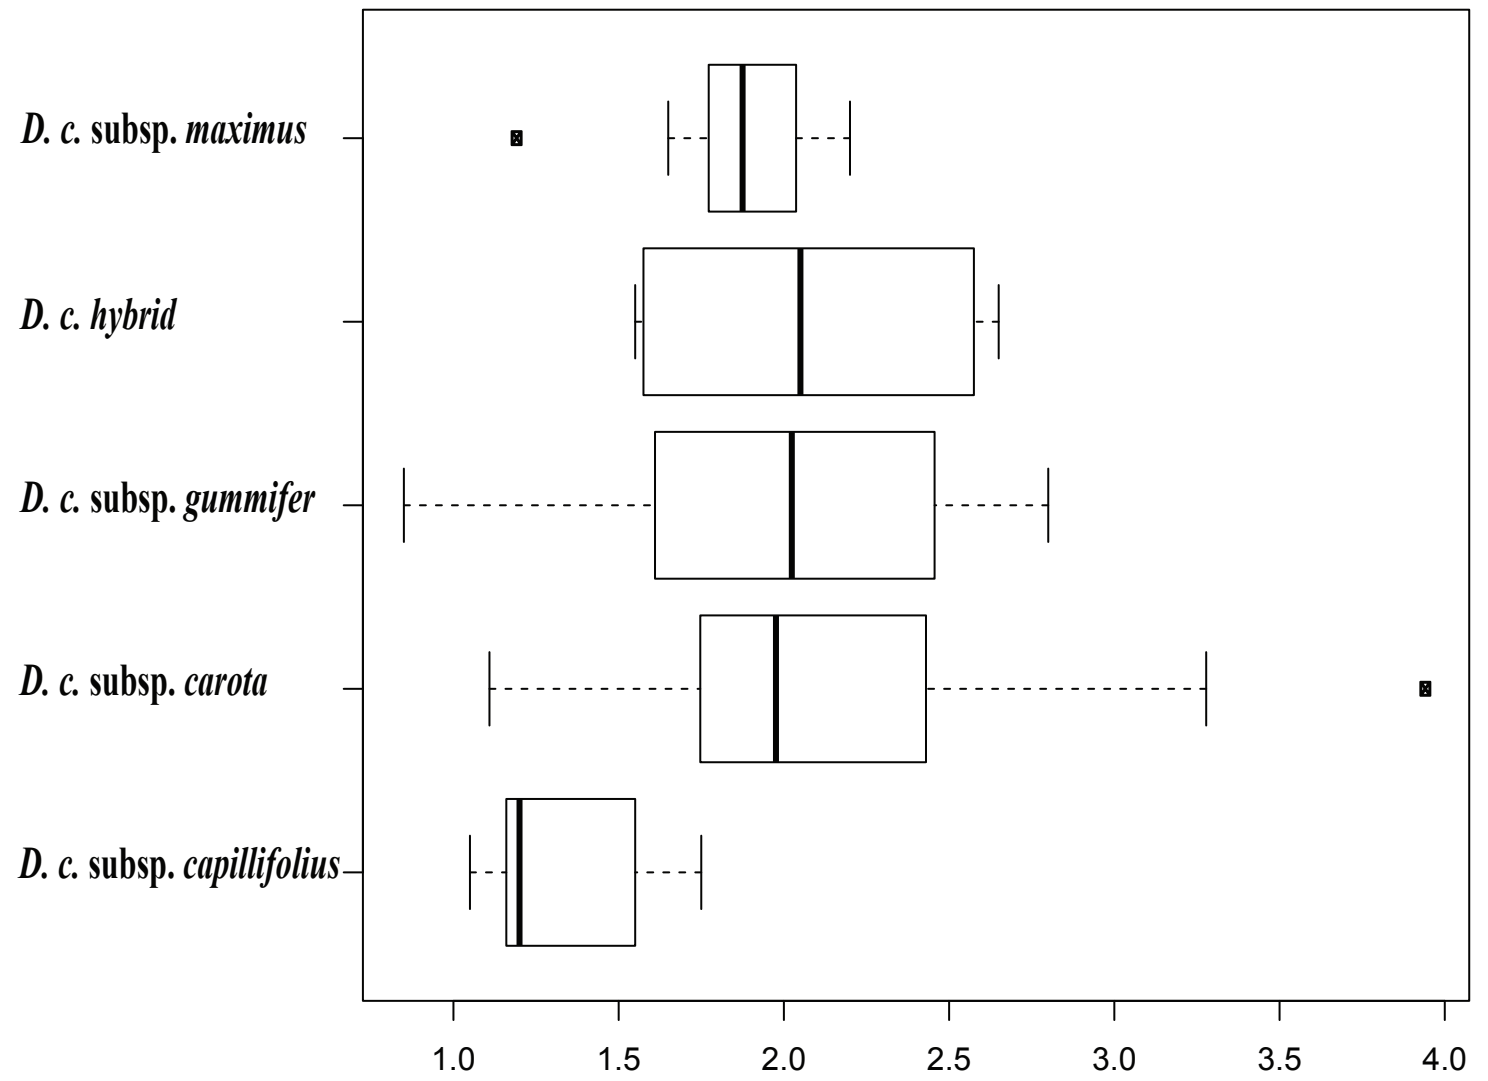

### Primary Umbel Height (cm)

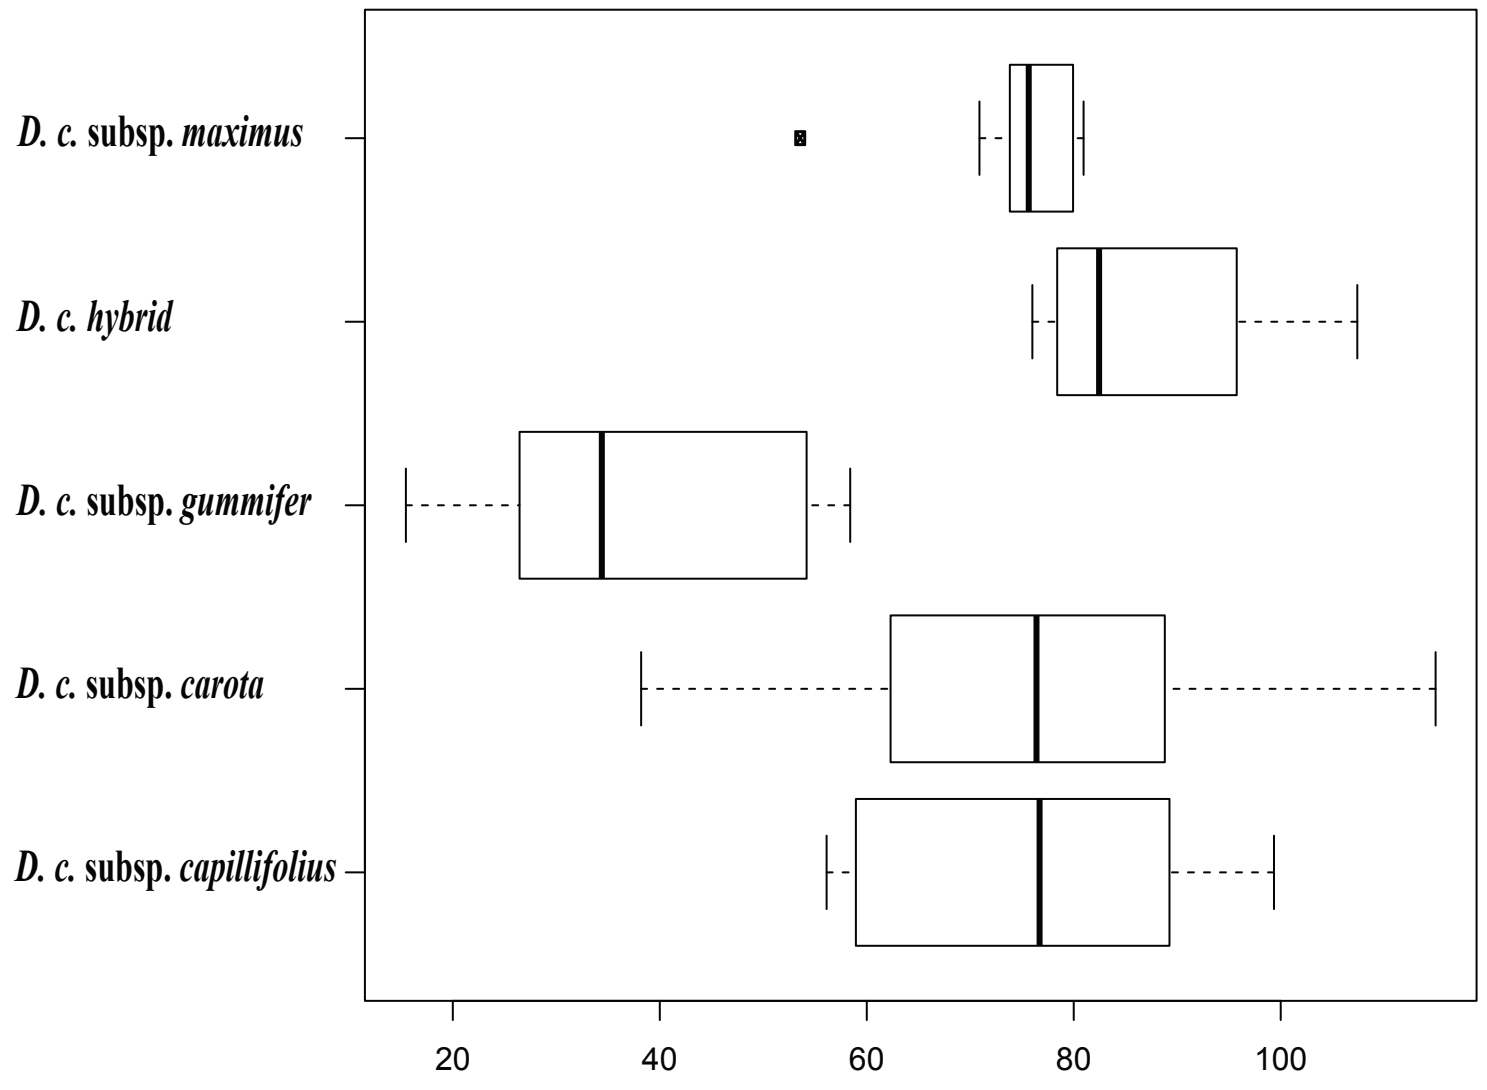



### Primary Umbel Diameter (cm)

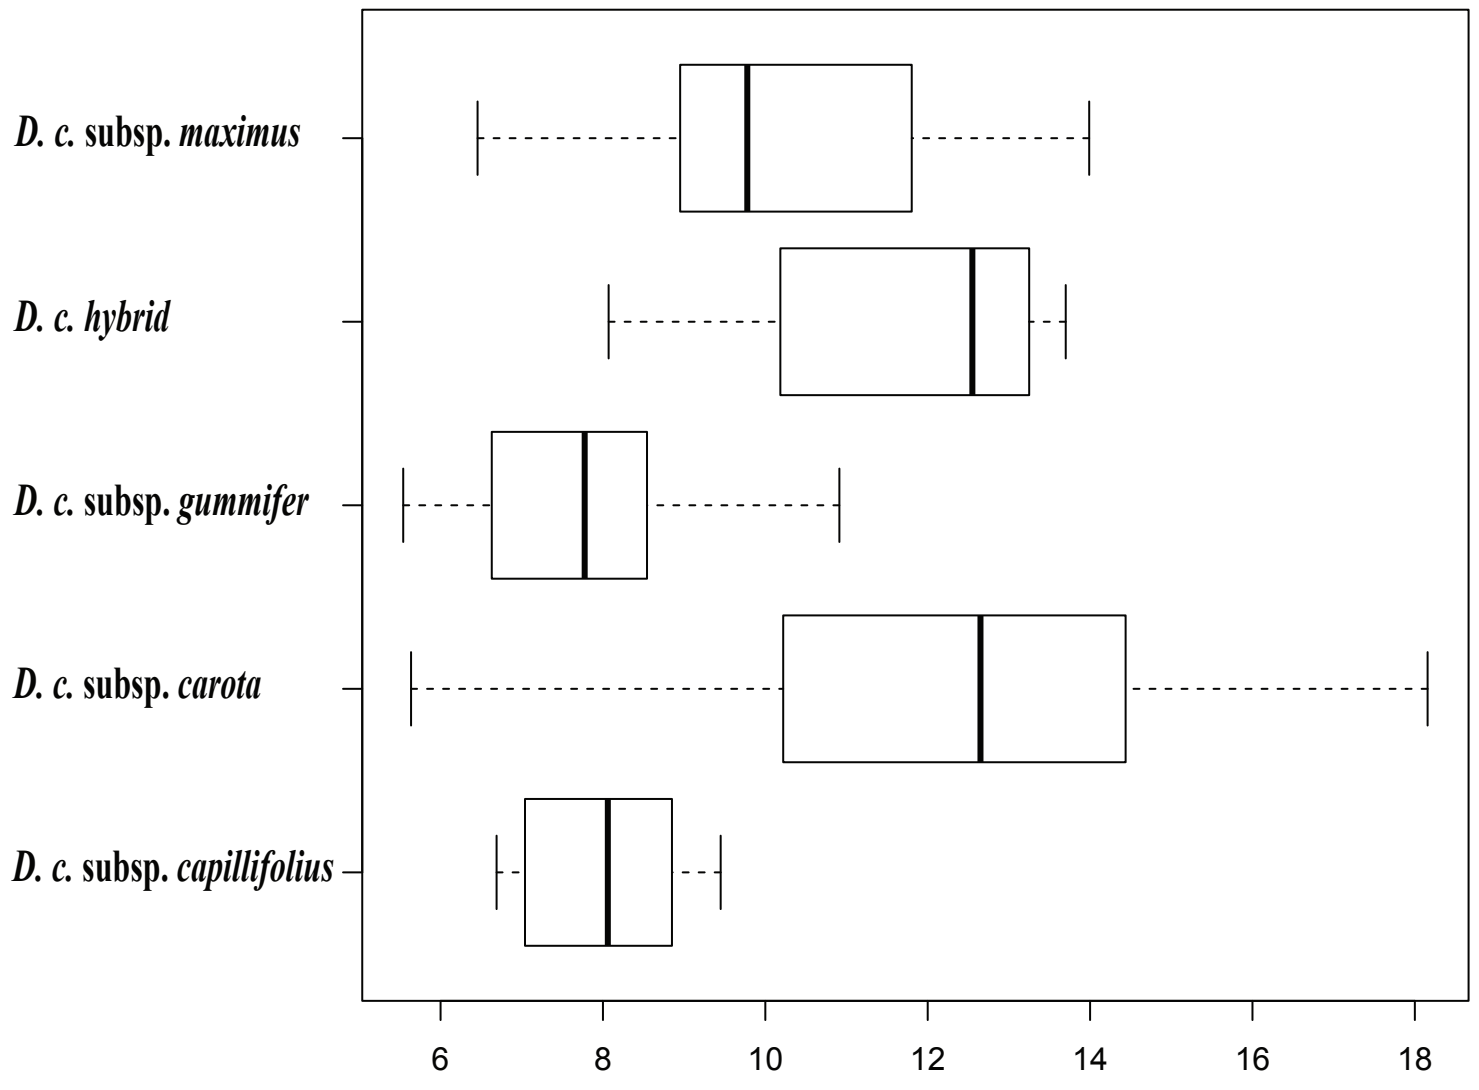

### Secondary Umbel Diameter (cm)

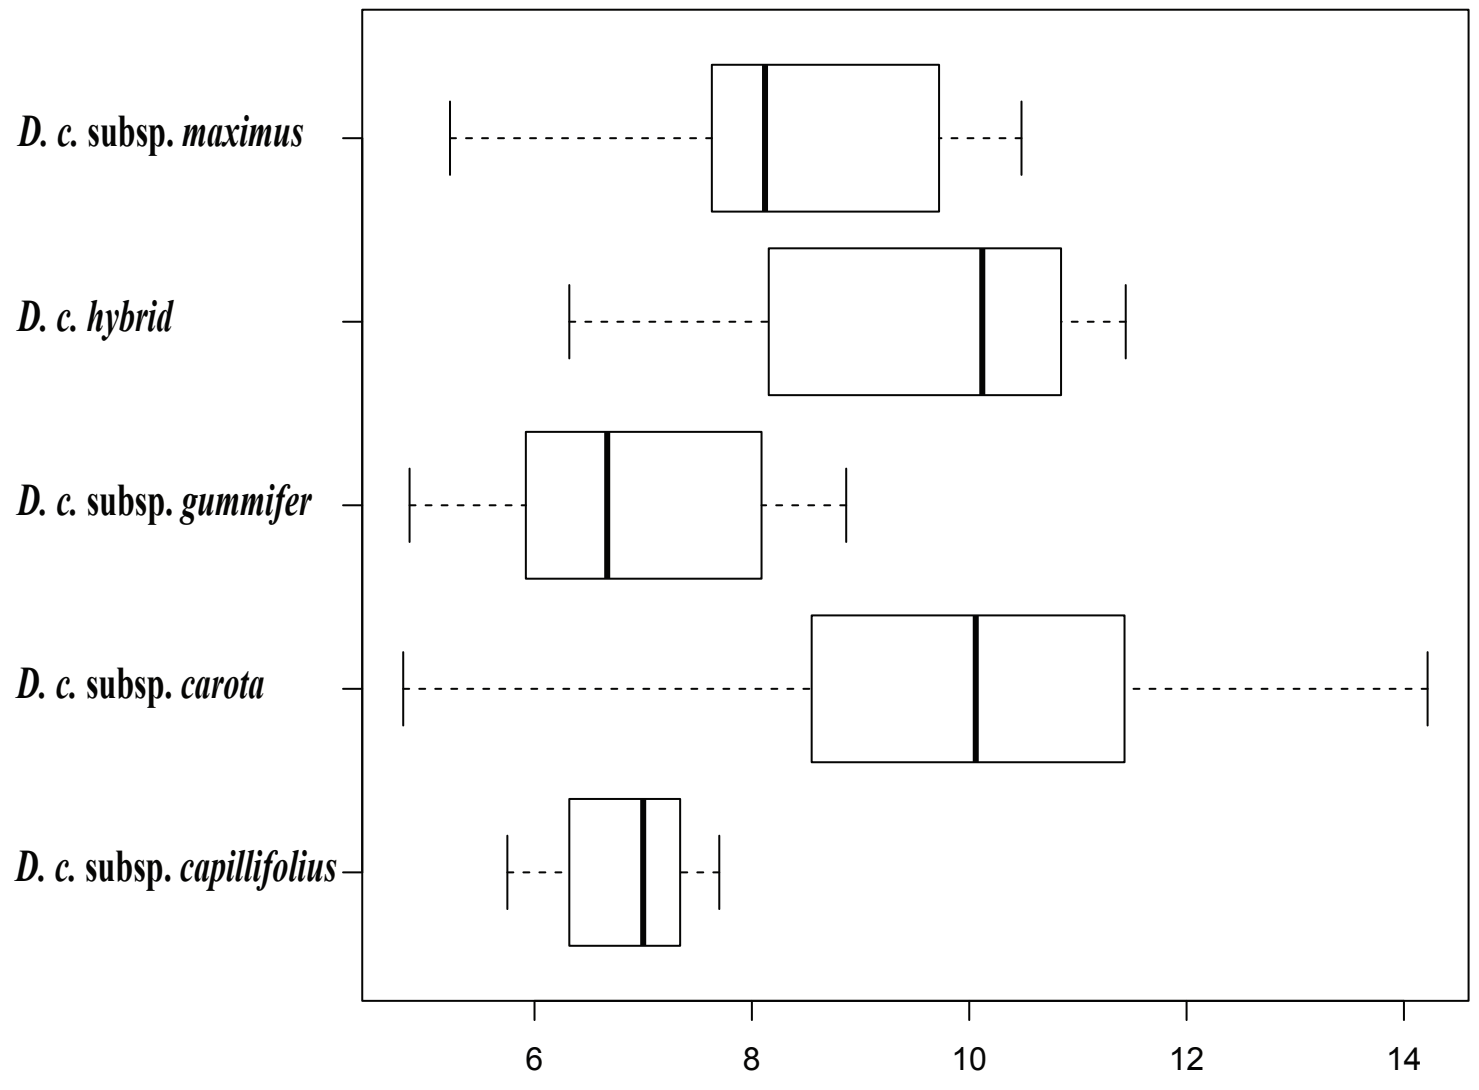

### Bract Length (mm)

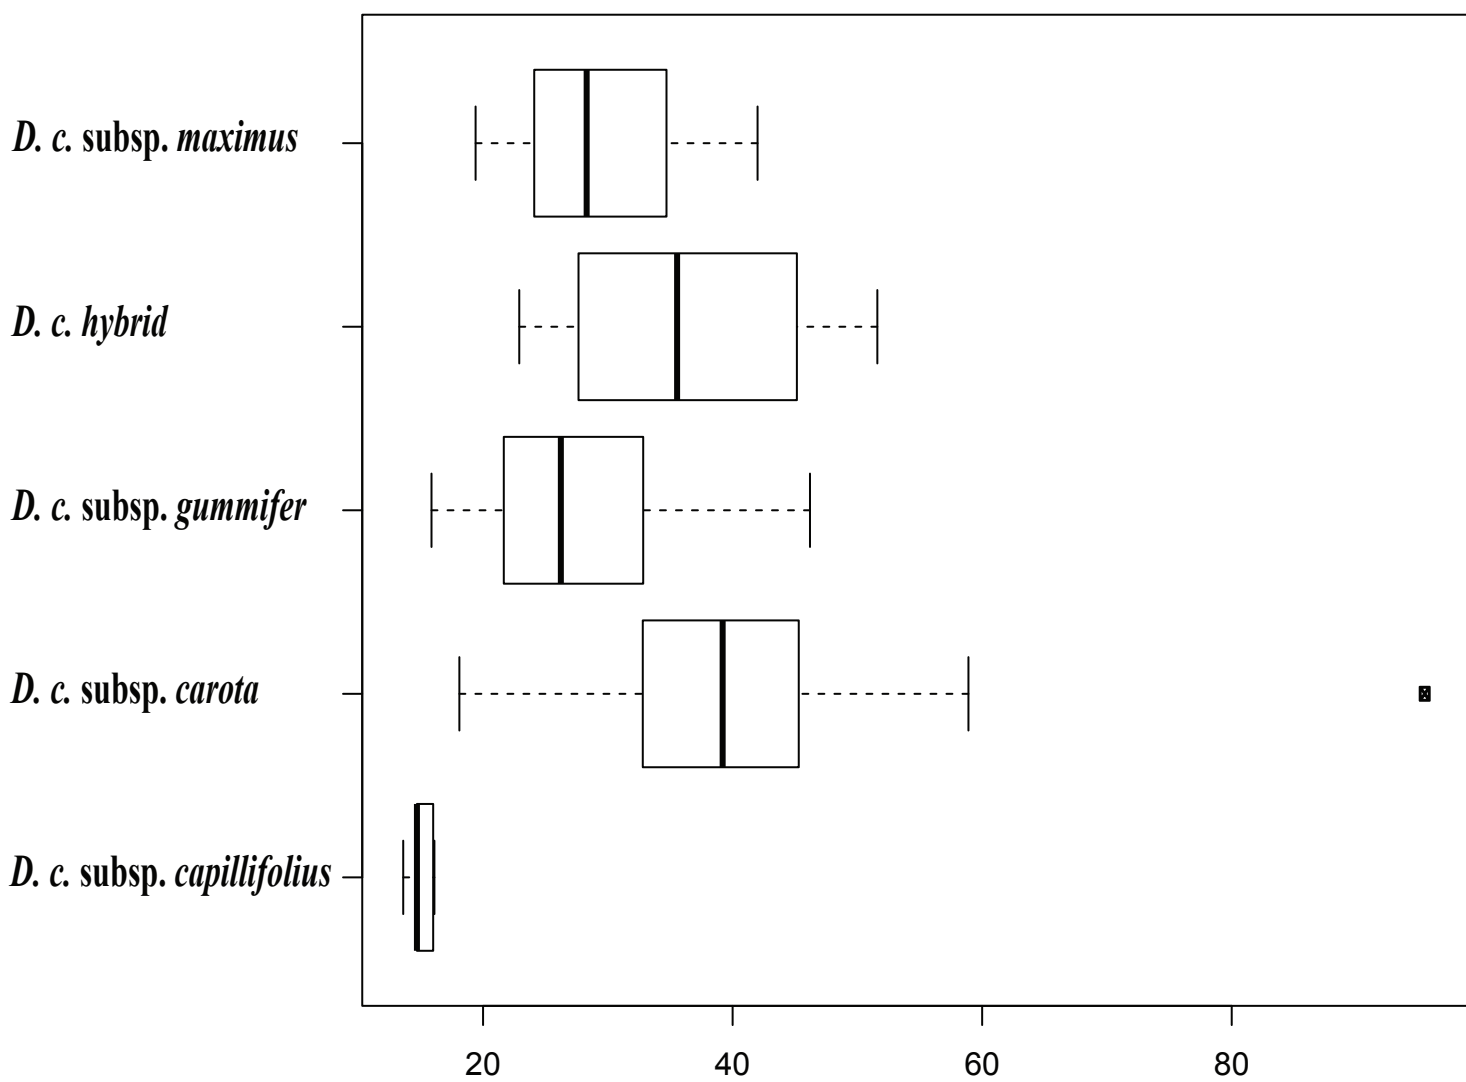

### Bract Width (mm)

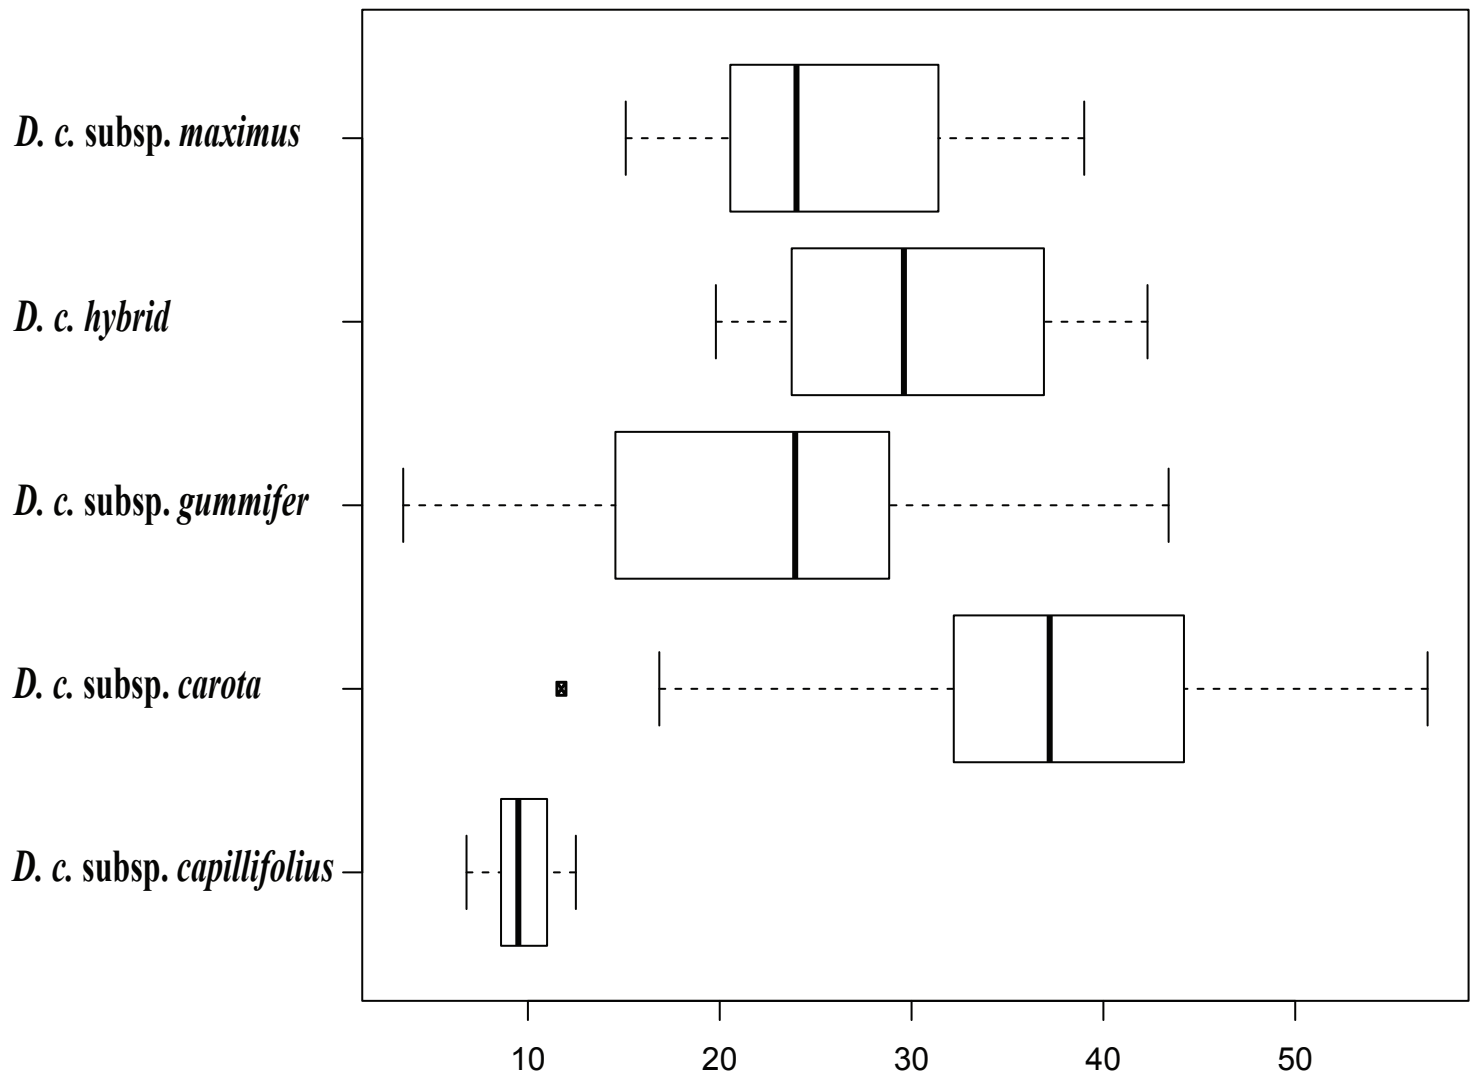

### Number of Bract Lobe Points

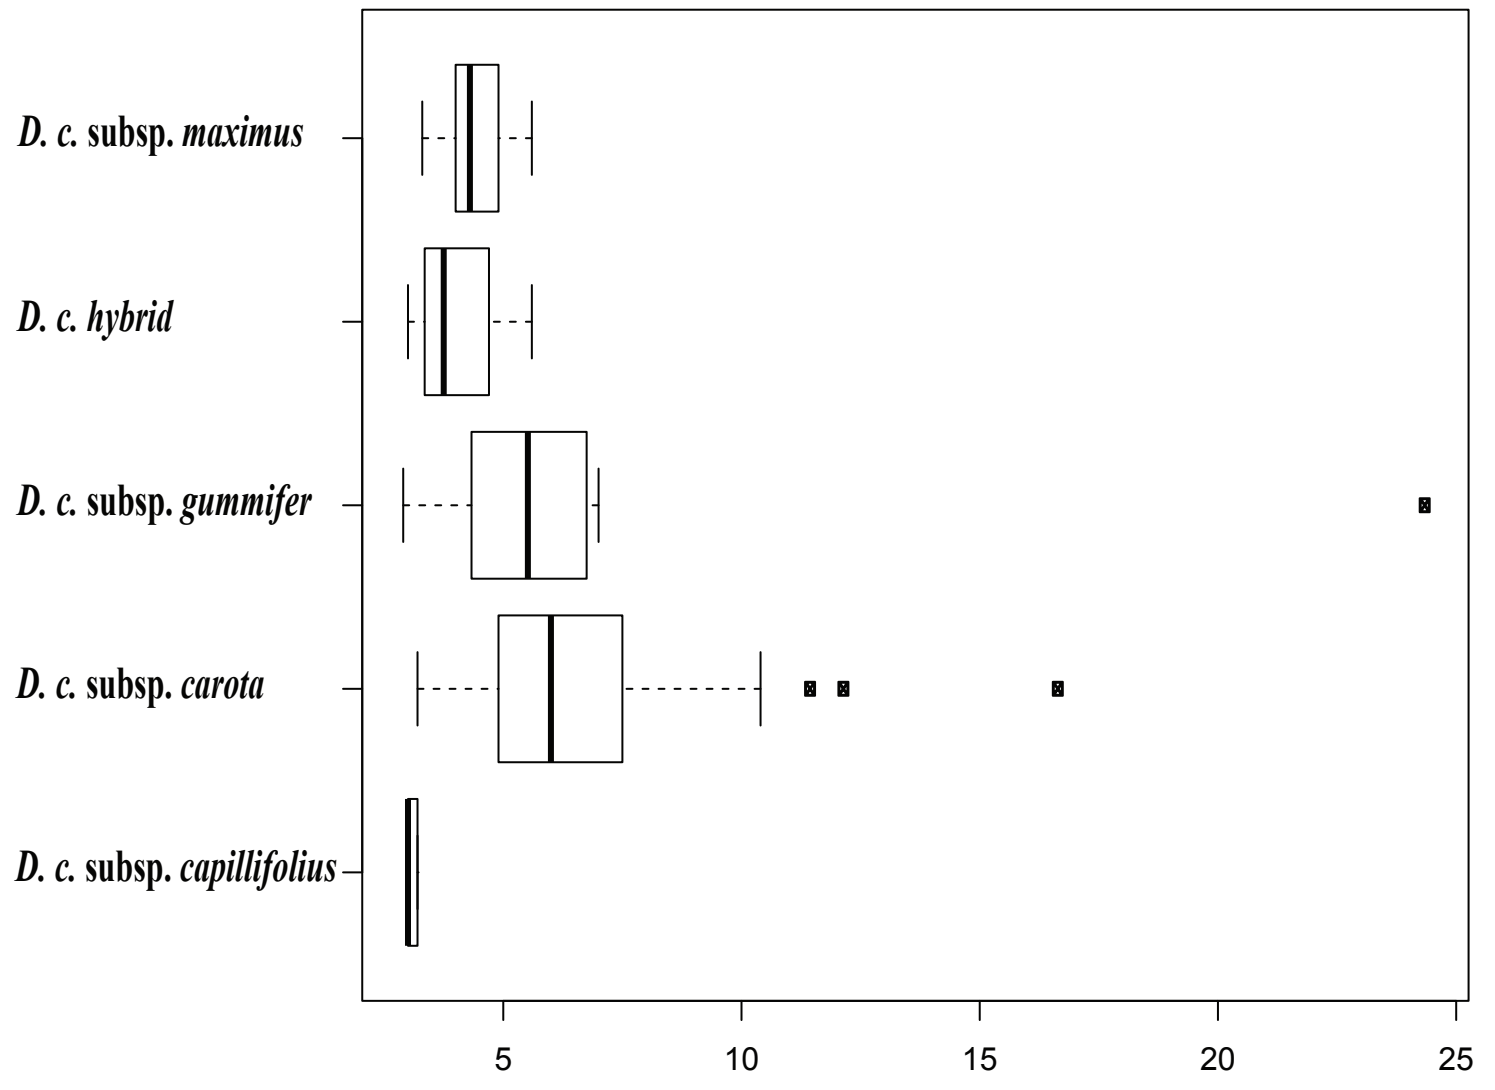

### Number of Bract Lobe Pairs

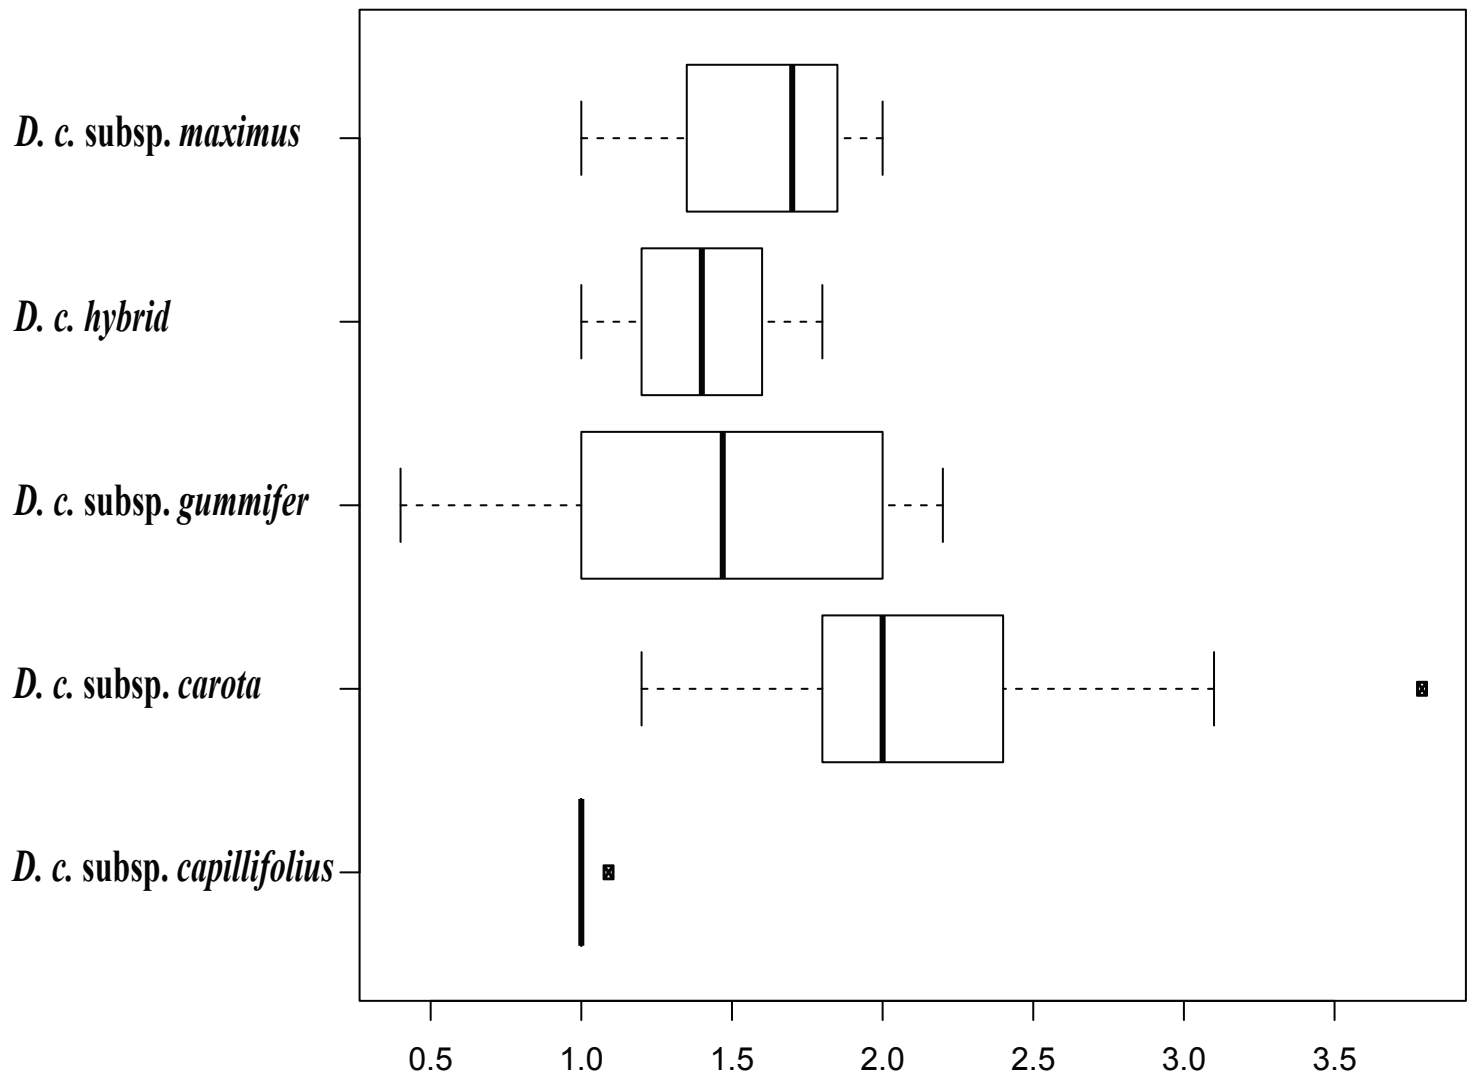

### Number of Umbel Rays

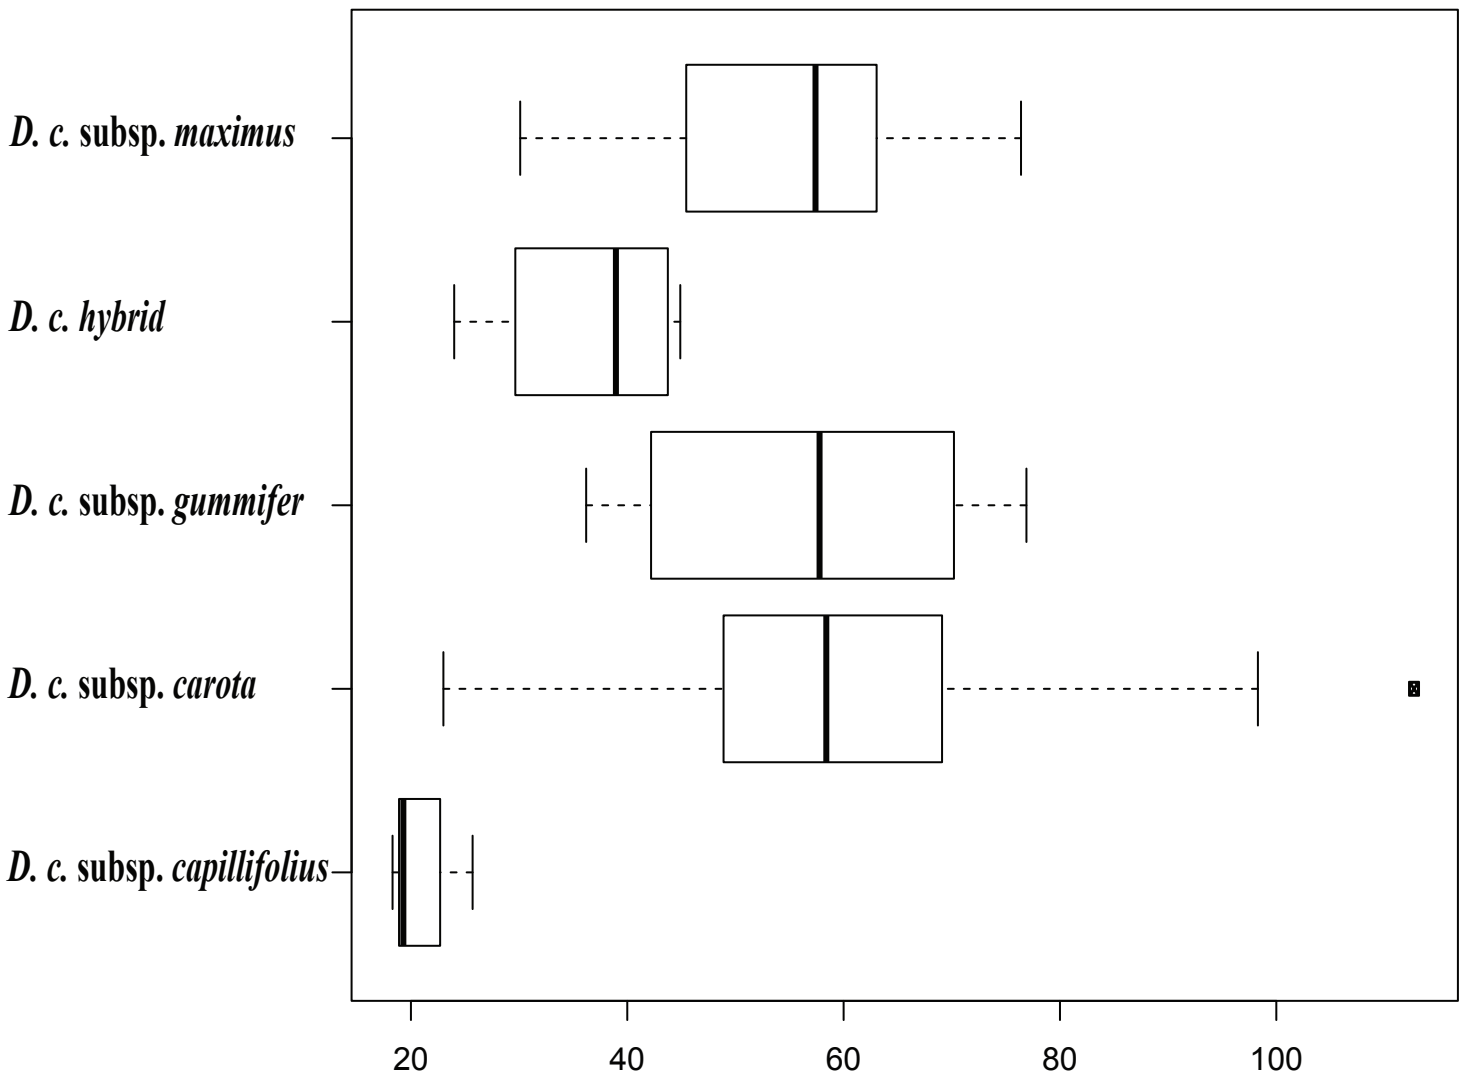

### Peripheral Petal Length (mm)

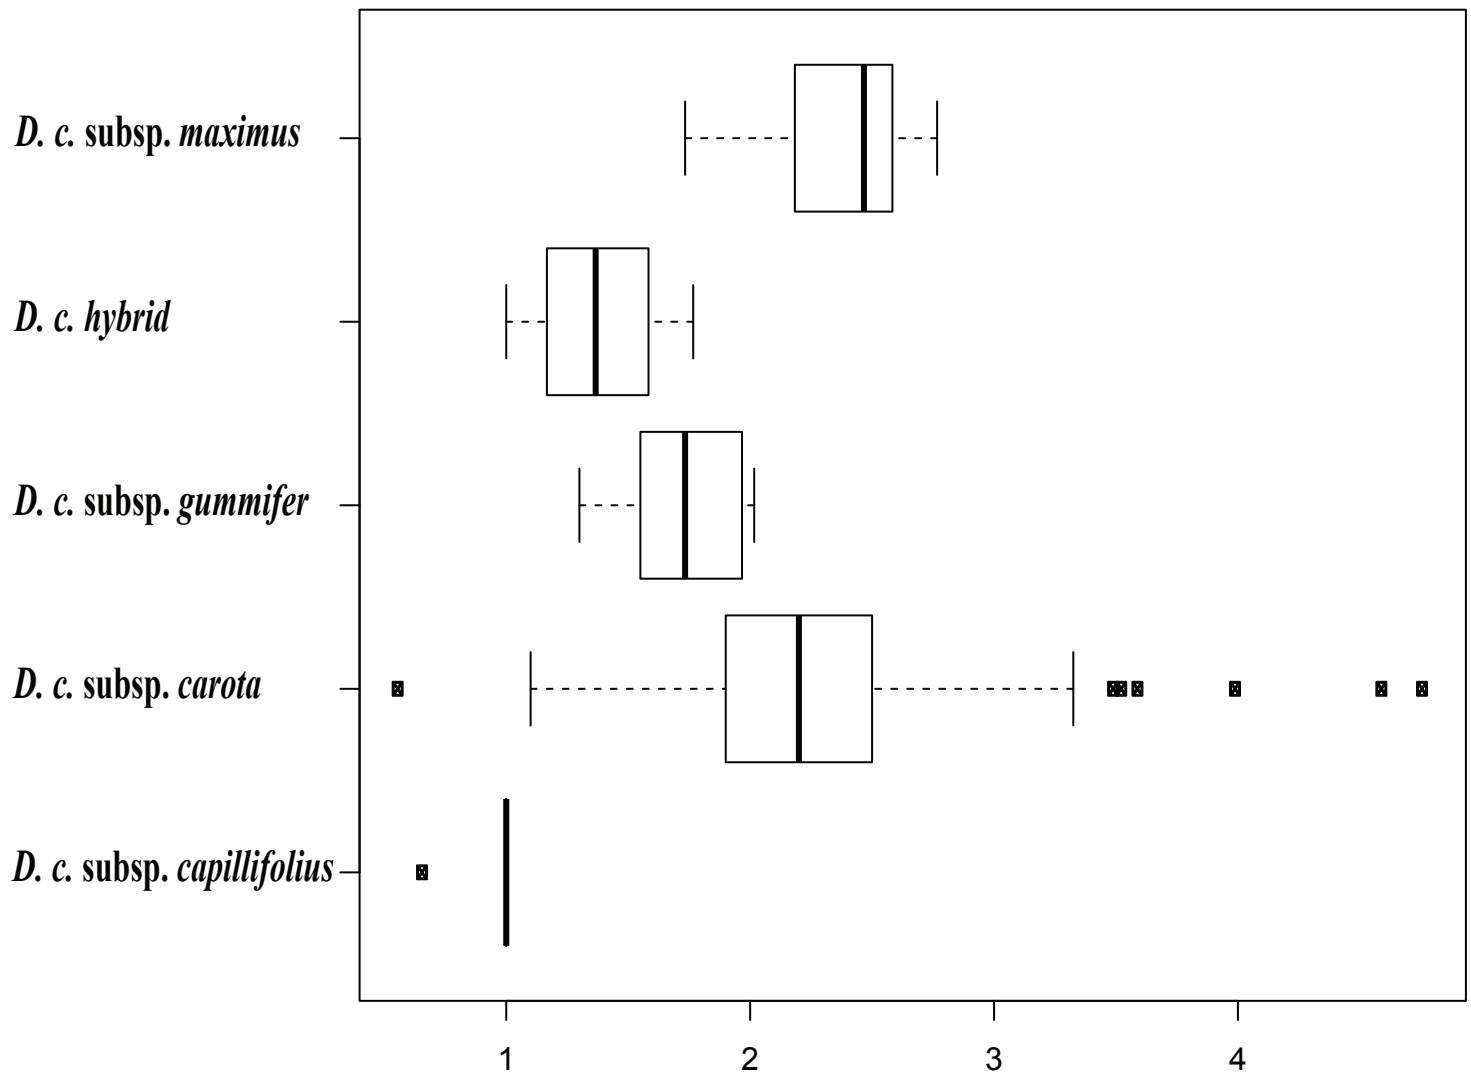



### Central Petal Length (mm)

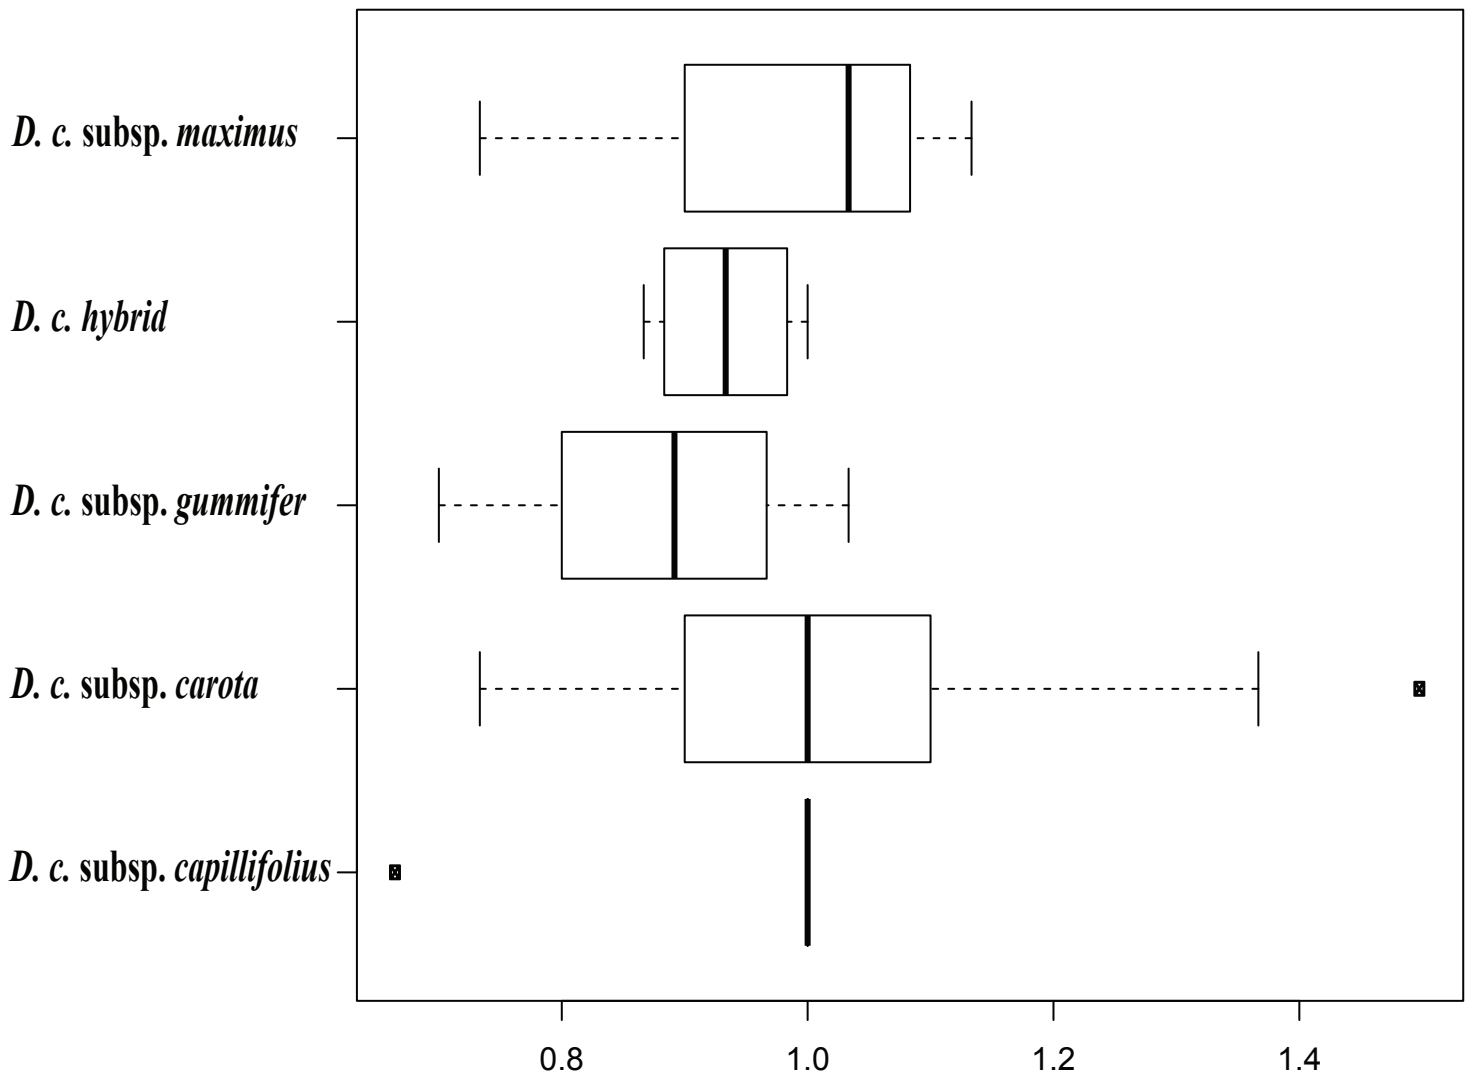

### Stamen Length (mm)

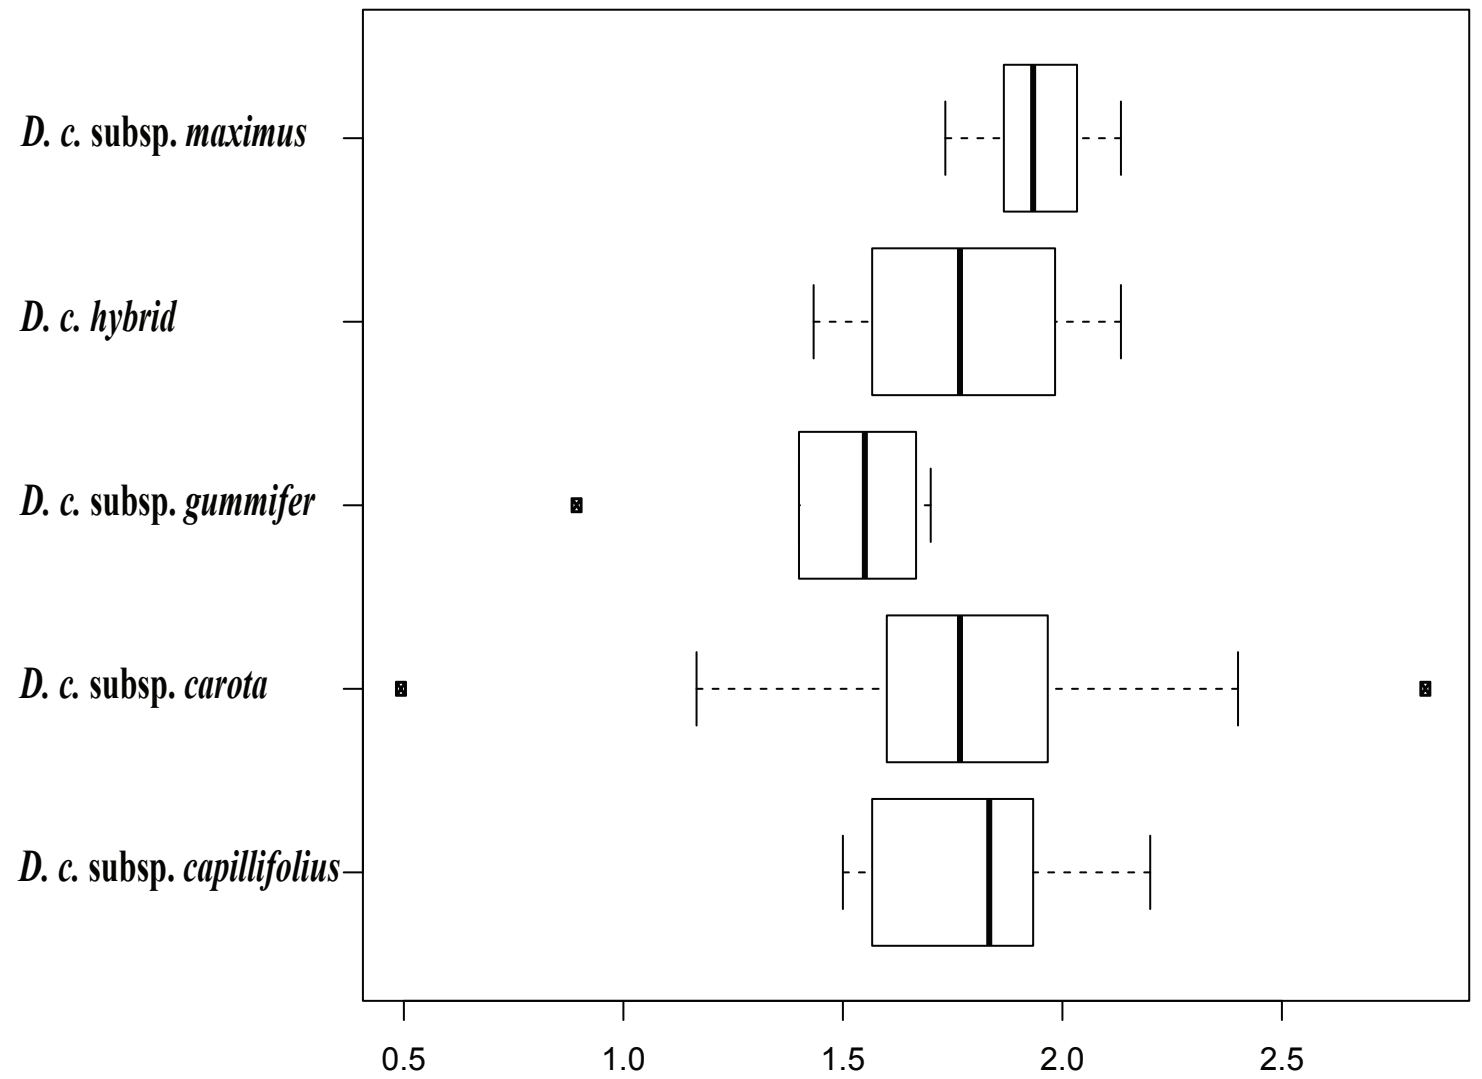

### Mericaip Length (mm)

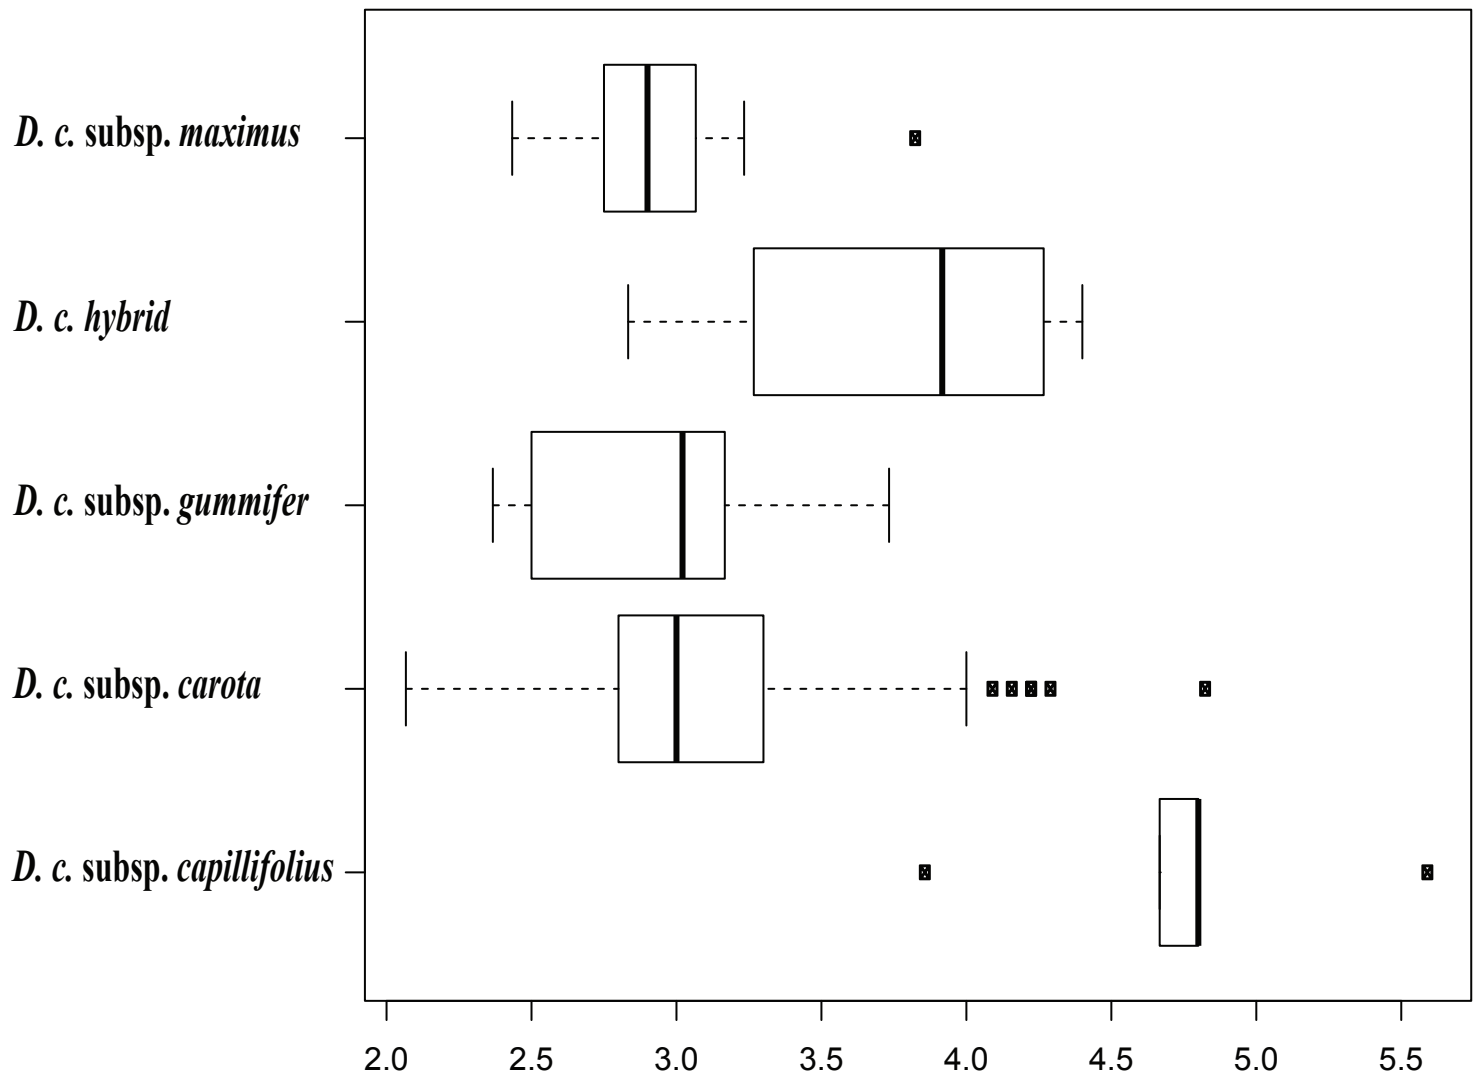

### Mericarp Width (mm)

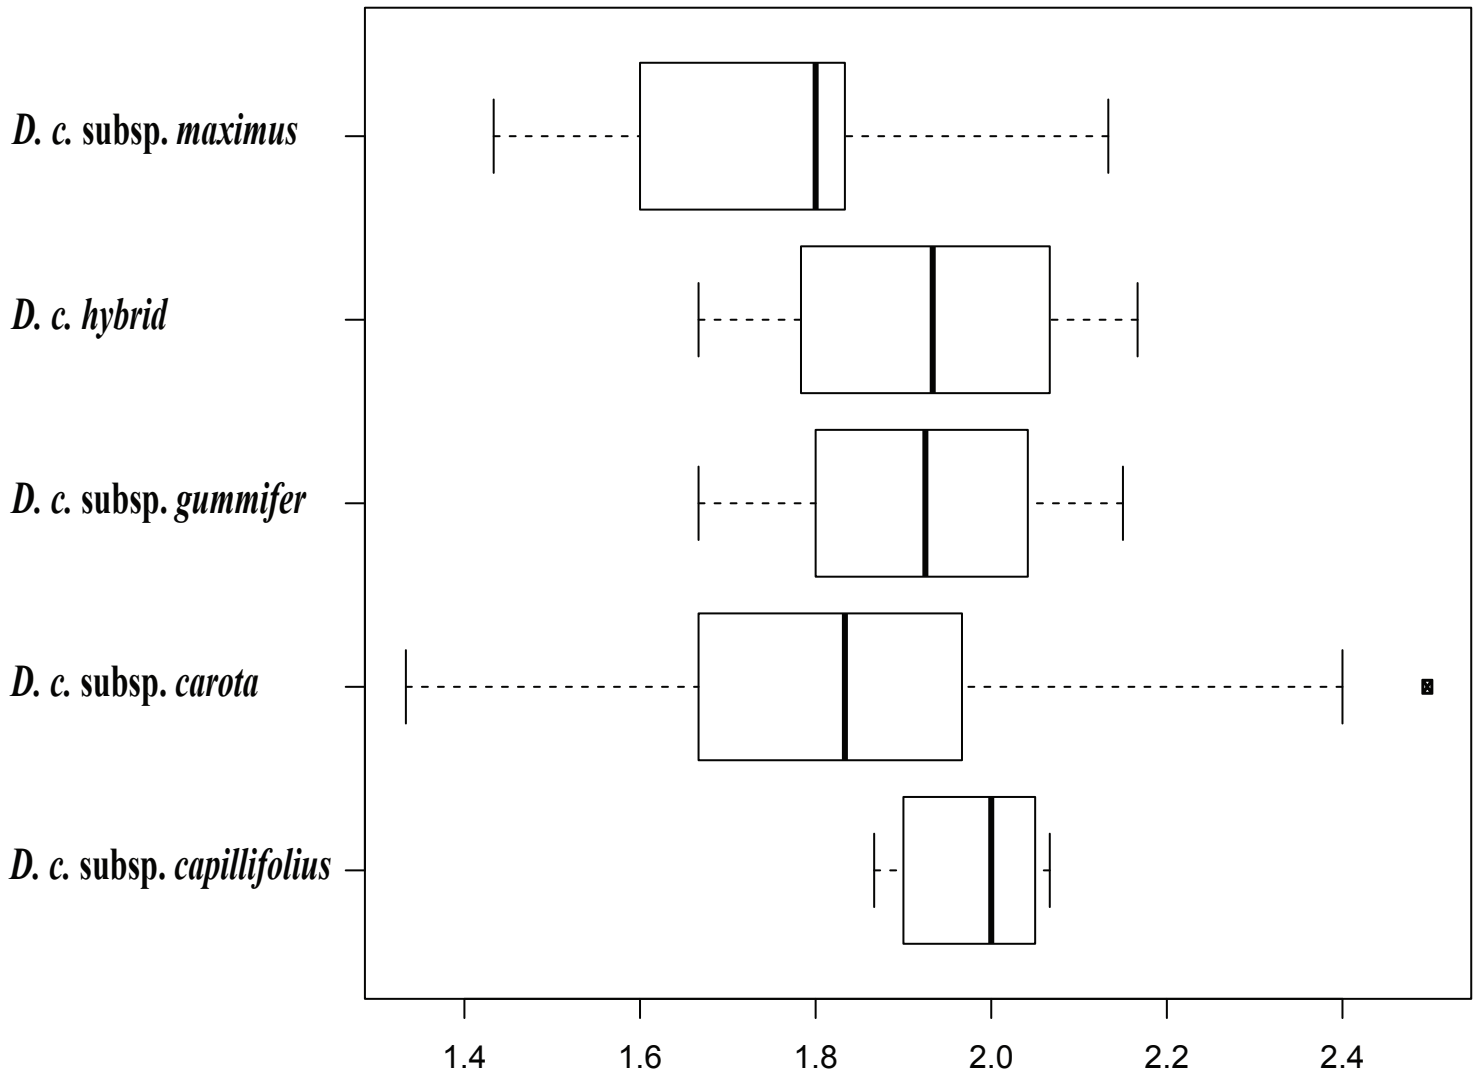

### Width of Secondary Mericarp Rib Confluency (mm)

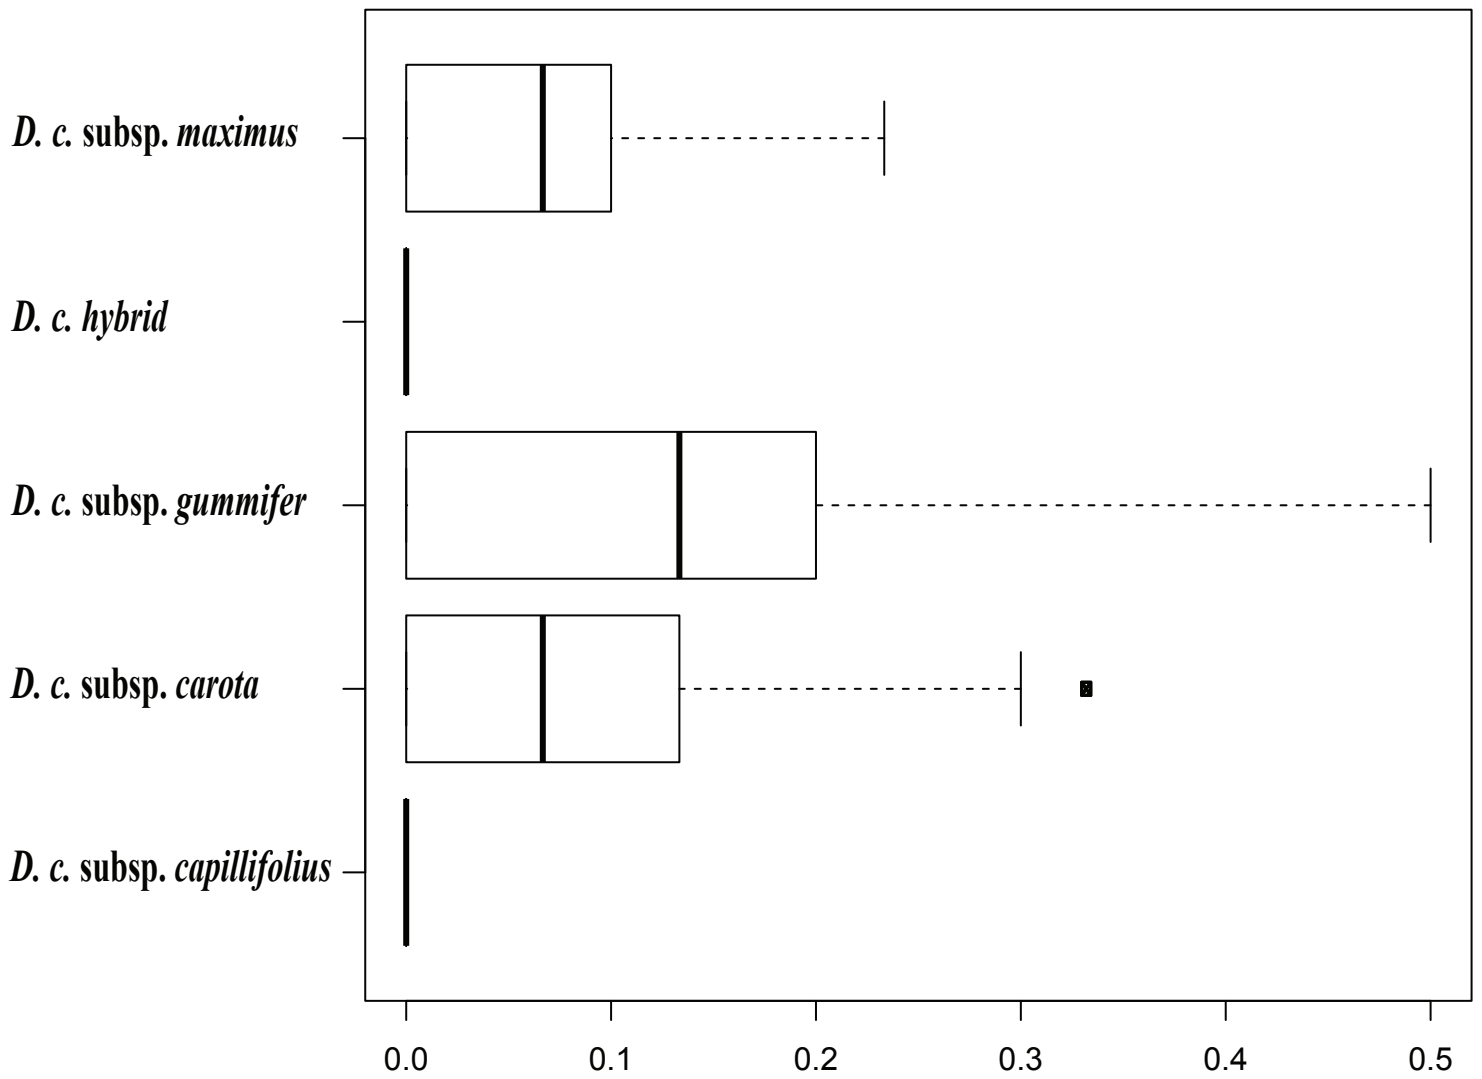

### Number of Spines on the Four Secondary Mericarp Ribs

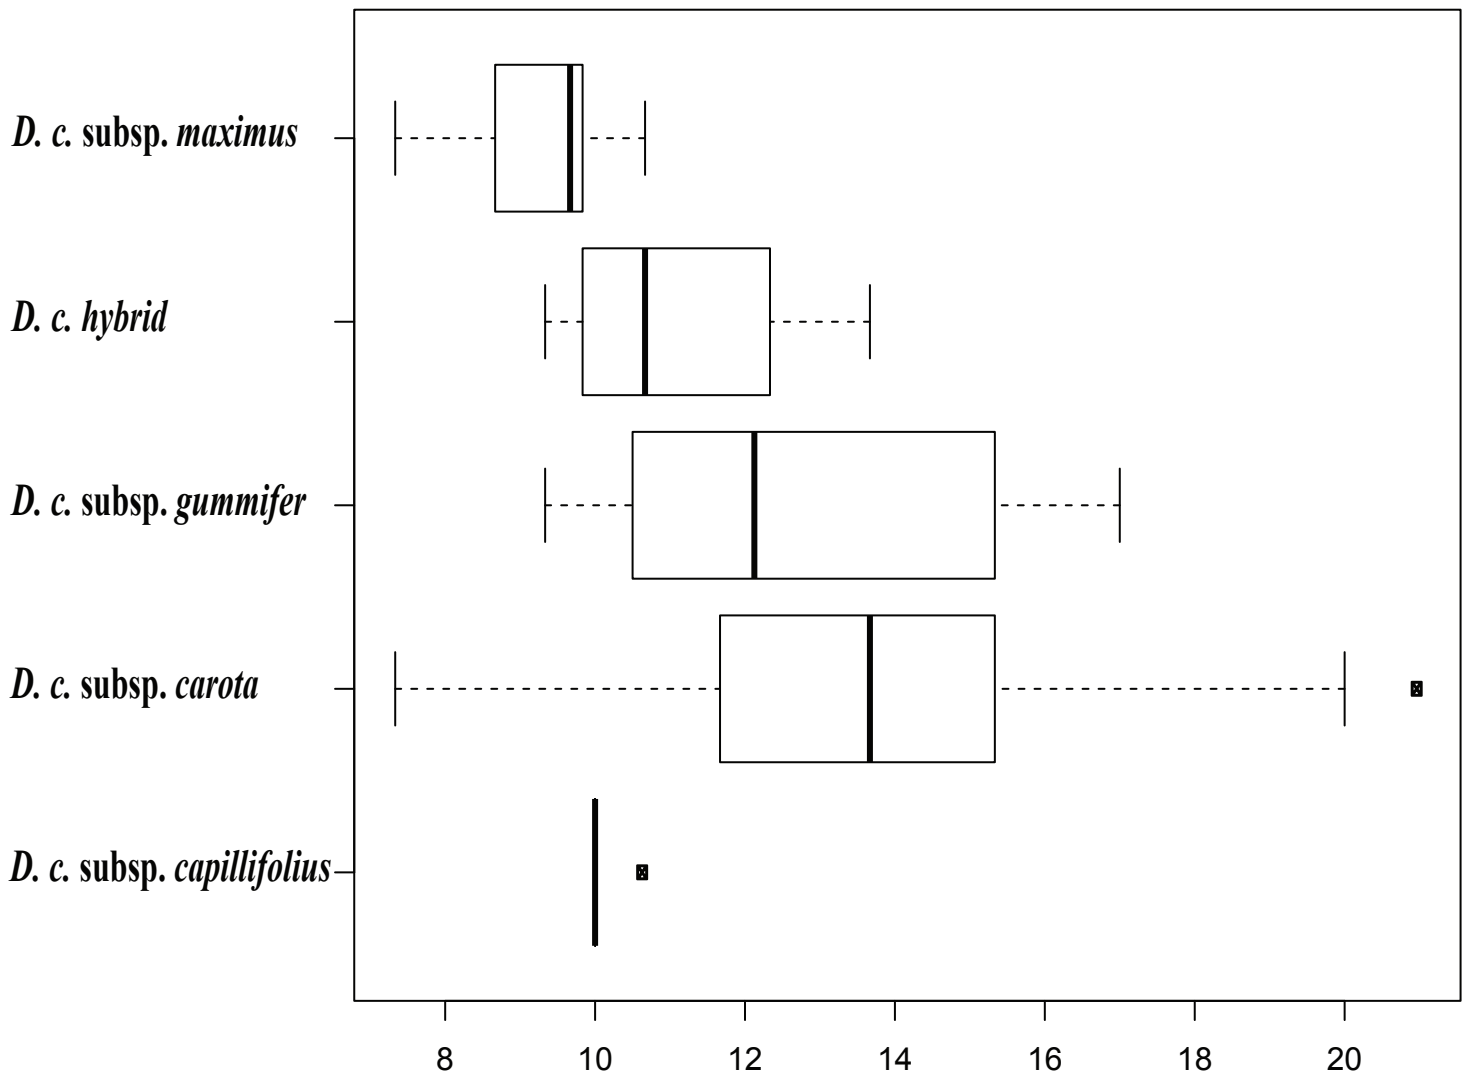

### Length of Secondary Mericarp Spines (mm)

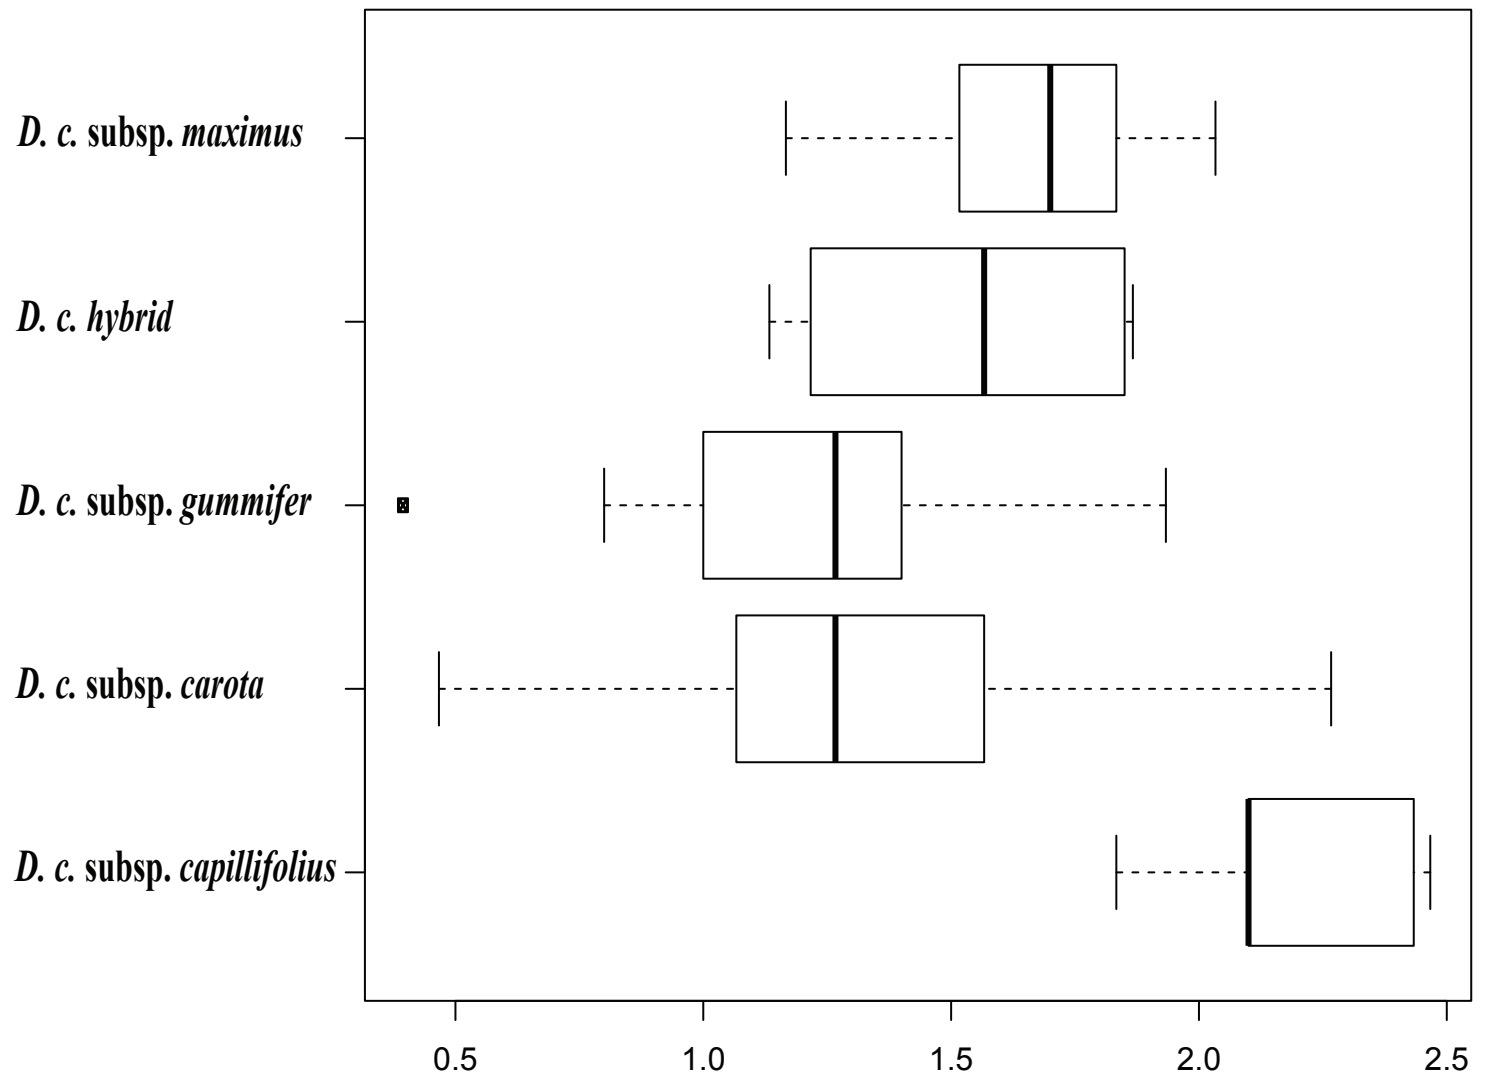

Supplement: 12862_2016_806_MOESM12_ESM.pdf [file 12862_2016_806_MOESM12_ESM.pdf]
