# Supplementary material for: Genotyping-by-sequencing provides the discriminating power to investigate the subspecies of Daucus carota (Apiaceae)
Source: PubMed Central journal article supplement (PMC5084430; doi:10.1186/s12862-016-0806-x), 2016-10-28
Supplement: 12862_2016_806_MOESM1_ESM.pdf [file 12862_2016_806_MOESM1_ESM.pdf]

**Additional file 1: Table S1.** The 162 accessions of *Daucus*, and two accessions of related genera characterized in this study, improvement status, locality information and new identification.

| Accessions <sup>a</sup> | Taxon and 2n Chromosome Number <sup>b</sup> | Improvement Status | Location or Source <sup>c</sup>                                 | Geographic Region    | New Identification                     |
|-------------------------|---------------------------------------------|--------------------|-----------------------------------------------------------------|----------------------|----------------------------------------|
| PI 319403               | <i>Daucus aureus</i> Desf. (22) +           | Wild               | Israel. Mediterranean Region.                                   |                      |                                        |
| Ames 25731              | <i>D. carota</i> L. (18, all subspecies) +  | Wild               | Syria. Al-Qastal: 30 km northeast of Al Ladhiqiyah.             |                      | <i>D. guttatus</i>                     |
| Ames 25732              | <i>D. carota</i> +                          | Wild               | Syria. Al-Qastal: 30 km northeast of Al Ladhiqiyah.             |                      | <i>D. guttatus</i>                     |
| Ames 25771              | <i>D. carota</i>                            | Wild               | Syria. Kfarya: Near Salma.                                      | Middle East          | <i>D. carota</i> subsp. <i>carota</i>  |
| Ames 25778              | <i>D. carota</i> +                          | Wild               | Syria. Kasab.                                                   |                      | <i>D. guttatus</i>                     |
| Ames 26404              | <i>D. carota</i>                            | Wild               | Portugal. Evora: Near Portel.                                   | Iberian Peninsula    | <i>D. carota</i> subsp. <i>maximus</i> |
| Ames 26405              | <i>D. carota</i>                            | Wild               | Portugal. Beja: Near Baleizão.                                  | Iberian Peninsula    | <i>D. carota</i> subsp. <i>maximus</i> |
| Ames 26406              | <i>D. carota</i>                            | Wild               | Portugal. Beja: Near Ourique.                                   | Iberian Peninsula    | <i>D. carota</i> subsp. <i>maximus</i> |
| Ames 26409              | <i>D. carota</i>                            | Wild               | Portugal. Faro: Near Salema.                                    | Iberian Peninsula    | <i>D. carota</i> subsp. <i>maximus</i> |
| Ames 27396              | <i>D. carota</i>                            | Wild               | Uzbekistan. On main road from Village of Sijjak.                | Central Asia         | <i>D. carota</i> subsp. <i>carota</i>  |
| Ames 27400              | <i>D. carota</i>                            | Cultivated         | Uzbekistan. Tashkent.                                           | Eastern Central Asia | <i>D. carota</i> subsp. <i>sativus</i> |
| Ames 27411              | <i>D. carota</i>                            | Wild               | Uzbekistan.                                                     | Central Asia         | <i>D. carota</i> subsp. <i>carota</i>  |
| Ames 27413              | <i>D. carota</i>                            | Wild               | Uzbekistan. Chetsuv Village.                                    | Central Asia         | <i>D. carota</i> subsp. <i>carota</i>  |
| Ames 27414              | <i>D. carota</i>                            | Wild               | Uzbekistan. Chetsuv Village.                                    | Central Asia         | <i>D. carota</i> subsp. <i>carota</i>  |
| Ames 27415              | <i>D. carota</i>                            | Wild               | Uzbekistan. Chetsuv Village: Approximately 50 meters from Z10.  | Central Asia         | <i>D. carota</i> subsp. <i>carota</i>  |
| Ames 29084              | <i>D. carota</i>                            | Landrace           | Tunisia.                                                        |                      | <i>D. carota</i> subsp. <i>sativus</i> |
| Ames 30250              | <i>D. carota</i>                            | Wild               | Tunisia. Nabuel: along Route 28 at junction of road to Takelsa. | North Africa         | <i>D. carota</i> subsp. <i>carota</i>  |
| Ames 30252              | <i>D. carota</i>                            | Wild               | Tunisia. Nabuel: Sidi Daoud, 1 km from Route 27.                | North Africa         | <i>D. carota</i> subsp. <i>carota</i>  |

|            |                  |      |                                                                                                                                                   |              |                                         |
|------------|------------------|------|---------------------------------------------------------------------------------------------------------------------------------------------------|--------------|-----------------------------------------|
| Ames 30260 | <i>D. carota</i> | Wild | Tunisia. Bizerte: along Route 51, west of Ghzab.                                                                                                  | North Africa | <i>D. carota</i> subsp. <i>carota</i>   |
| Ames 30261 | <i>D. carota</i> | Wild | Tunisia. Bizerte: grounds of Direction Regionale Mogods, Khroumerie Sejnane.                                                                      | North Africa | <i>D. carota</i> subsp. <i>carota</i>   |
| Ames 31548 | <i>D. carota</i> | Wild | Morocco. Sefrou: Along Route N8, 24 miles north of Azrou, Oulad Mkoudou Region.                                                                   | Morocco      | <i>D. carota</i> subsp. <i>maximus</i>  |
| Ames 31553 | <i>D. carota</i> | Wild | Morocco. Fes: Along Route N6 (road to Taza from Fes), just east of deviation with Route N8, Sidi Harazem.                                         | Morocco      | <i>D. carota</i> subsp. <i>maximus</i>  |
| Ames 31554 | <i>D. carota</i> | Wild | Morocco. Fes: Along Route N6 (road to Taza), 13 kilometers from deviation with Route N8, 28 kilometers east of downtown Fes, Sidi Harazem Region. | Morocco      | <i>D. carota</i> subsp. <i>maximus</i>  |
| Ames 31555 | <i>D. carota</i> | Wild | Morocco. Sefrou: Along Route N6, 28 kilometers from deviation with Route N8, 58 kilometers east of downtown Fes, Bir Tam Tam Region.              | Morocco      | <i>D. carota</i> subsp. <i>maximus</i>  |
| Ames 31558 | <i>D. carota</i> | Wild | Morocco. Sefrou: Along Route R503, south side of Fes, 6 kilometers north of Sefrou, Aghbalou Aqorar Region.                                       | Morocco      | <i>D. carota</i> subsp. <i>maximus</i>  |
| Ames 31559 | <i>D. carota</i> | Wild | Morocco. Meknes: Along Route N4, 36 kilometers west of Fes, east of Sidi Kacem, Mhaya Region.                                                     | Morocco      | <i>D. carota</i> subsp. <i>maximus</i>  |
| Ames 31562 | <i>D. carota</i> | Wild | Morocco. Sidi Kacem: Along Route 410, 4 kilometers south of Mechra Belqsiri, Sefsaf Region.                                                       | Morocco      | <i>D. carota</i> subsp. <i>maximus</i>  |
| Ames 31570 | <i>D. carota</i> | Wild | Morocco. Larache: approximately 10 kilometers south of Larache, Laouamra Region.                                                                  | Morocco      | <i>D. carota</i> subsp. <i>maximus</i>  |
| Ames 31580 | <i>D. carota</i> | Wild | Morocco. Nador: Along Route N16, 41 kilometers west of Nador, approximately 0.5 kilometer from Mediterranean                                      | Morocco      | <i>D. carota</i> subsp. <i>gummifer</i> |

|            |                  |            |                                                                                                                   |                   |                                        |
|------------|------------------|------------|-------------------------------------------------------------------------------------------------------------------|-------------------|----------------------------------------|
|            |                  |            | Sea, Amejjaou Region.                                                                                             |                   |                                        |
|            |                  |            | Morocco. Berkane: Along Route S403, approximately 5 kilometers northwest of road to Sidi Bouhria, Rislane Region. | Morocco           | <i>D. carota</i> subsp. <i>maximus</i> |
| Ames 31584 | <i>D. carota</i> | Wild       |                                                                                                                   |                   |                                        |
|            |                  |            | Morocco. Safi: 11 kilometers east of Safi on Route 204, Khatazakane Region.                                       | Morocco           | <i>D. carota</i> subsp. <i>maximus</i> |
| Ames 31592 | <i>D. carota</i> | Wild       |                                                                                                                   |                   |                                        |
| PI 163234  | <i>D. carota</i> | Cultivated | India. Madhya Pradesh.                                                                                            | Eastern           | <i>D. carota</i> subsp. <i>sativus</i> |
| PI 163235  | <i>D. carota</i> | Cultivated | Pakistan. Punjab.                                                                                                 | Eastern           | <i>D. carota</i> subsp. <i>sativus</i> |
| PI 176563  | <i>D. carota</i> | Cultivated | Turkey. Kutahya.                                                                                                  | Eastern           | <i>D. carota</i> subsp. <i>sativus</i> |
| PI 187235  | <i>D. carota</i> | Cultivated | Belgium.                                                                                                          | Western           | <i>D. carota</i> subsp. <i>sativus</i> |
| PI 222249  | <i>D. carota</i> | Cultivated | Iran. Tehran.                                                                                                     | Eastern           | <i>D. carota</i> subsp. <i>sativus</i> |
| PI 249535  | <i>D. carota</i> | Cultivated | Spain.                                                                                                            | Western           | <i>D. carota</i> subsp. <i>sativus</i> |
| PI 256066  | <i>D. carota</i> | Cultivated | Afghanistan. Kabul.                                                                                               | Eastern           | <i>D. carota</i> subsp. <i>sativus</i> |
| PI 264235  | <i>D. carota</i> | Cultivated | France.                                                                                                           | Western           | <i>D. carota</i> subsp. <i>sativus</i> |
| PI 264236  | <i>D. carota</i> | Cultivated | France.                                                                                                           | Western           | <i>D. carota</i> subsp. <i>sativus</i> |
| PI 264543  | <i>D. carota</i> | Cultivated | Japan. Osaka.                                                                                                     | Eastern           | <i>D. carota</i> subsp. <i>sativus</i> |
| PI 268382  | <i>D. carota</i> | Cultivated | Afghanistan. Kabul.                                                                                               | Eastern           | <i>D. carota</i> subsp. <i>sativus</i> |
| PI 269319  | <i>D. carota</i> | Cultivated | Sweden.                                                                                                           | Western           | <i>D. carota</i> subsp. <i>sativus</i> |
| PI 271348  | <i>D. carota</i> | Cultivated | India. Delhi.                                                                                                     | Eastern           | <i>D. carota</i> subsp. <i>sativus</i> |
| PI 279759  | <i>D. carota</i> | Landrace   | Spain. Madrid (Botanic Garden).                                                                                   |                   | <i>D. carota</i> subsp. <i>sativus</i> |
| PI 279762  | <i>D. carota</i> | Landrace   | Denmark. Copenhagen.                                                                                              |                   | <i>D. carota</i> subsp. <i>sativus</i> |
| PI 279798  | <i>D. carota</i> | Landrace   | Spain. Madrid (Botanic Garden).                                                                                   |                   | <i>D. carota</i> subsp. <i>sativus</i> |
| PI 280706  | <i>D. carota</i> | Wild       | Chile. Concepcion.                                                                                                | South America     | <i>D. carota</i> subsp. <i>maximus</i> |
| PI 341204  | <i>D. carota</i> | Cultivated | France.                                                                                                           | Western           | <i>D. carota</i> subsp. <i>sativus</i> |
| PI 502914  | <i>D. carota</i> | Cultivated | Germany.                                                                                                          | Western           | <i>D. carota</i> subsp. <i>sativus</i> |
| PI 634651  | <i>D. carota</i> | Cultivated | USA. Minnesota.                                                                                                   | Western           | <i>D. carota</i> subsp. <i>sativus</i> |
| PI 643114  | <i>D. carota</i> | Cultivated | USA. California.                                                                                                  | Western           | <i>D. carota</i> subsp. <i>sativus</i> |
| PI 652222  | <i>D. carota</i> | Wild       | Portugal. Vila Real: S. Joao da Pesqueira, Tras-os-Montes (Alto Douro) Province.                                  | Iberian Peninsula | <i>D. carota</i> subsp. <i>carota</i>  |
| PI 652237  | <i>D. carota</i> | Wild       | Bulgaria. Lovech: Balkan Mountains.                                                                               | Balkan Peninsula  | <i>D. carota</i> subsp. <i>carota</i>  |

|            |                  |            |                                                                                                                                                        |                      |                                        |
|------------|------------------|------------|--------------------------------------------------------------------------------------------------------------------------------------------------------|----------------------|----------------------------------------|
| PI 652257  | <i>D. carota</i> | Cultivated | India. Delhi.                                                                                                                                          | Eastern              | <i>D. carota</i> subsp. <i>sativus</i> |
| PI 652301  | <i>D. carota</i> | Wild       | Greece. Ionian Islands:<br>Englouvi.                                                                                                                   | Balkan<br>Peninsula  | <i>D. carota</i> subsp. <i>carota</i>  |
| PI 652335  | <i>D. carota</i> | Cultivated | Syria. Damascus.                                                                                                                                       | Eastern              | <i>D. carota</i> subsp. <i>sativus</i> |
| PI 652336  | <i>D. carota</i> | Cultivated | Syria. Damascus.                                                                                                                                       | Eastern              | <i>D. carota</i> subsp. <i>sativus</i> |
| PI 652337  | <i>D. carota</i> | Wild       | Syria. Sweida.                                                                                                                                         | Middle<br>East       | <i>D. carota</i> subsp. <i>carota</i>  |
| PI 652338  | <i>D. carota</i> | Wild       | Syria. Sweida.                                                                                                                                         | Middle<br>East       | <i>D. carota</i> subsp. <i>carota</i>  |
| PI 652348  | <i>D. carota</i> | Wild       | Turkey. Izmir: West of Izmir.                                                                                                                          | Middle<br>East       | <i>D. carota</i> subsp. <i>carota</i>  |
| PI 661219  | <i>D. carota</i> | Wild       | USA. Washington: South side<br>of Route 507 (old Highway<br>99), just southwest of Tenino<br>Avenue junction with Mina<br>Acres Drive, Thurston County | North<br>America     | <i>D. carota</i> subsp. <i>carota</i>  |
| PI 661231  | <i>D. carota</i> | Wild       | USA. California: Crescent<br>City, Del Norte County.                                                                                                   | North<br>America     | <i>D. carota</i> subsp. <i>carota</i>  |
| Ames 26395 | <i>D. carota</i> | Wild       | Portugal. Faro: Near Fuseta.                                                                                                                           | Iberian<br>Peninsula | <i>D. carota</i> subsp. <i>maximus</i> |
| Ames 27395 | <i>D. carota</i> | Wild       | Uzbekistan. Northeast of<br>Gazelkent on main road to<br>Tashkent.                                                                                     | Central<br>Asia      | <i>D. carota</i> subsp. <i>carota</i>  |
| Ames 30267 | <i>D. carota</i> | Wild       | Tunisia. Jendouba: Road 11<br>between Ain Draham to Beja,<br>near km 47.5.                                                                             | North<br>Africa      | <i>D. carota</i> subsp. <i>carota</i>  |
| PI 274298  | <i>D. carota</i> | Wild       | Pakistan. Four miles west of<br>Parachinar.                                                                                                            | Central<br>Asia      | <i>D. carota</i> subsp. <i>carota</i>  |
| PI 344447  | <i>D. carota</i> | Cultivated | Iran. Hamadan.                                                                                                                                         | Eastern              | <i>D. carota</i> subsp. <i>sativus</i> |
| PI 478874  | <i>D. carota</i> | Wild       | Italy. Sicily: Catania.                                                                                                                                | North<br>Africa      | <i>D. carota</i> subsp. <i>carota</i>  |
| PI 652224  | <i>D. carota</i> | Wild       | Poland. Lomza.                                                                                                                                         | Europe               | <i>D. carota</i> subsp. <i>carota</i>  |
| PI 652299  | <i>D. carota</i> | Wild       | Greece. Ionian Islands:<br>Vasiliki.                                                                                                                   | Balkan<br>Peninsula  | <i>D. carota</i> subsp. <i>carota</i>  |
| PI 652304  | <i>D. carota</i> | Wild       | Greece. Peloponnese: 10 km<br>south of Patrai, toward<br>Pyrgos.                                                                                       | Balkan<br>Peninsula  | <i>D. carota</i> subsp. <i>carota</i>  |
| PI 652306  | <i>D. carota</i> | Wild       | Greece. Peloponnese: Near<br>Koklas village, toward<br>Sparti, Messenia Prefecture.                                                                    | Balkan<br>Peninsula  | <i>D. carota</i> subsp. <i>carota</i>  |
| PI 652349  | <i>D. carota</i> | Wild       | Turkey. Izmir: West of Izmir.                                                                                                                          | Middle<br>East       | <i>D. carota</i> subsp. <i>carota</i>  |

|            |                                                             |      |                                                                                     |                   |                                        |
|------------|-------------------------------------------------------------|------|-------------------------------------------------------------------------------------|-------------------|----------------------------------------|
| PI 652352  | <i>D. carota</i>                                            | Wild | Turkey. Izmir: Near Bağarasi.                                                       | Middle East       | <i>D. carota</i> subsp. <i>carota</i>  |
| Ames 30198 | <i>D. carota</i> subsp. <i>capillifolius</i> (Gilli) Arbizu | Wild | Tunisia. Medenine: Djerba Island, Boumellel, 2 km north of Houmt Souk.              | North Africa      |                                        |
| Ames 30202 | <i>D. carota</i> subsp. <i>capillifolius</i>                | Wild | Tunisia. Medenine: Djerba Island, just outside of south end of El May.              | North Africa      |                                        |
| Ames 30207 | <i>D. carota</i> subsp. <i>capillifolius</i>                | Wild | Tunisia. Medenine: Road to El Kantara, south of Djerba Island.                      | North Africa      |                                        |
| PI 279764  | <i>D. carota</i> subsp. <i>capillifolius</i>                | Wild | Libya. Near Jefren.                                                                 | North Africa      |                                        |
| Ames 25740 | <i>D. carota</i> subsp. <i>carota</i>                       | Wild | Syria. As Samra.                                                                    | Middle East       |                                        |
| Ames 25762 | <i>D. carota</i> subsp. <i>carota</i>                       | Wild | Syria. Deir Mama.                                                                   | Middle East       |                                        |
| Ames 26374 | <i>D. carota</i> subsp. <i>carota</i>                       | Wild | Portugal. Porto: Near Vila do Conde.                                                | Iberian Peninsula | <i>D. carota</i> subsp. <i>carota</i>  |
| Ames 26377 | <i>D. carota</i> subsp. <i>carota</i>                       | Wild | Portugal. Portalegre: Near Monforte.                                                | Iberian Peninsula | <i>D. carota</i> subsp. <i>maximus</i> |
| Ames 26379 | <i>D. carota</i> subsp. <i>carota</i>                       | Wild | Portugal. Portalegre: Near Marvao.                                                  | Iberian Peninsula | <i>D. carota</i> subsp. <i>carota</i>  |
| Ames 27397 | <i>D. carota</i> subsp. <i>carota</i>                       | Wild | Uzbekistan. Along main road between Yalangoch and Sobir Raximova.                   | Central Asia      |                                        |
| Ames 30245 | <i>D. carota</i> subsp. <i>carota</i>                       | Wild | Tunisia. Zaghouan: Along road between Fahs and El Magrane.                          | North Africa      |                                        |
| Ames 30249 | <i>D. carota</i> subsp. <i>carota</i>                       | Wild | Tunisia. Nabeul: Along Route 26 between Saliman and Sidi Aissa.                     | North Africa      |                                        |
| Ames 30251 | <i>D. carota</i> subsp. <i>carota</i>                       | Wild | Tunisia. Nabuel: Route 26, between Takelsa and El Haouaria, 26 km from El Haouaria. | North Africa      |                                        |
| Ames 30262 | <i>D. carota</i> subsp. <i>carota</i>                       | Wild | Tunisia. Beja: road from Route 7, just west of Sejnane to Cap Negro.                | North Africa      |                                        |
| Ames 30271 | <i>D. carota</i> subsp. <i>carota</i>                       | Wild | Tunisia. Beja: Road between Beja and Nefza.                                         | North Africa      |                                        |
| Ames 30272 | <i>D. carota</i> subsp. <i>carota</i>                       | Wild | Tunisia. Jendouba: South of Hotel Tabarka beach.                                    | North Africa      |                                        |
| PI 274297  | <i>D. carota</i> subsp.                                     | Wild | Pakistan. Northern areas.                                                           | Central           |                                        |

|           |                                          |            |                                                                   |                   |                                        |
|-----------|------------------------------------------|------------|-------------------------------------------------------------------|-------------------|----------------------------------------|
|           | <i>carota</i>                            |            |                                                                   | Asia              |                                        |
| PI 279775 | <i>D. carota</i> subsp.<br><i>carota</i> | Landrace   | Hungary. Pest (Botanic Garden).                                   |                   | <i>D. carota</i> subsp. <i>sativus</i> |
| PI 279788 | <i>D. carota</i> subsp.<br><i>carota</i> | Landrace   | Austria. Vienna (Museum of Natural History).                      |                   | <i>D. carota</i> subsp. <i>sativus</i> |
| PI 295862 | <i>D. carota</i> subsp.<br><i>carota</i> | Wild       | Spain.                                                            | Iberian Peninsula | <i>D. carota</i> subsp. <i>maximus</i> |
| PI 421301 | <i>D. carota</i> subsp.<br><i>carota</i> | Wild       | USA. Kansas: Elk County.                                          | North America     |                                        |
| PI 430525 | <i>D. carota</i> subsp.<br><i>carota</i> | Cultivated | Afghanistan. Zardek.                                              | Eastern           | <i>D. carota</i> subsp. <i>sativus</i> |
| PI 478369 | <i>D. carota</i> subsp.<br><i>carota</i> | Wild       | China. Xinjiang: near Chou En Lai Monument Stone River, Sinkiang. | Central Asia      |                                        |
| PI 478859 | <i>D. carota</i> subsp.<br><i>carota</i> | Wild       | Italy. Misano Adriatico: Near Rimini.                             | Europe            |                                        |
| PI 478860 | <i>D. carota</i> subsp.<br><i>carota</i> | Wild       | France. Paris: Versailles Park, Seine et Oise.                    | Europe            |                                        |
| PI 478861 | <i>D. carota</i> subsp.<br><i>carota</i> | Wild       | France. Paris: Versailles Park, Seine et Oise.                    | Europe            |                                        |
| PI 478862 | <i>D. carota</i> subsp.<br><i>carota</i> | Wild       | France. Mere (Seine et Oise).                                     | Europe            |                                        |
| PI 478864 | <i>D. carota</i> subsp.<br><i>carota</i> | Wild       | Germany (Botanic Garden).                                         | Europe            |                                        |
| PI 478869 | <i>D. carota</i> subsp.<br><i>carota</i> | Wild       | Germany. Near Jüterbog.                                           | Europe            |                                        |
| PI 478873 | <i>D. carota</i> subsp.<br><i>carota</i> | Wild       | Italy. Sardinia: St. Elia Beach, 50 m from sea, Cagliari          | North Africa      |                                        |
| PI 478875 | <i>D. carota</i> subsp.<br><i>carota</i> | Wild       | Italy. Molise: Larino Province (Campobasso).                      | Europe            |                                        |
| PI 478876 | <i>D. carota</i> subsp.<br><i>carota</i> | Wild       | Italy. Latium (Botanic Garden).                                   | Europe            |                                        |
| PI 478877 | <i>D. carota</i> subsp.<br><i>carota</i> | Wild       | Switzerland. Geneva: Vandœuvres.                                  | Europe            |                                        |
| PI 478881 | <i>D. carota</i> subsp.<br><i>carota</i> | Wild       | USA. Oregon: roadside between Echo and Pendleton.                 | North America     |                                        |
| PI 652218 | <i>D. carota</i> subsp.<br><i>carota</i> | Wild       | Hungary. Near Bekes.                                              | Europe            |                                        |
| PI 652296 | <i>D. carota</i> subsp.<br><i>carota</i> | Wild       | Greece. Epirus: 7 km from Ioannina toward Igoumenitsa.            | Balkan Peninsula  |                                        |
| PI 652303 | <i>D. carota</i> subsp.<br><i>carota</i> | Wild       | Greece. Central Greece: Near Agrinion, toward Patrai.             | Balkan Peninsula  |                                        |

|            |                                                                                      |      |                                                                                                  |                   |                                         |
|------------|--------------------------------------------------------------------------------------|------|--------------------------------------------------------------------------------------------------|-------------------|-----------------------------------------|
| PI 652341  | <i>D. carota</i> subsp. <i>carota</i>                                                | Wild | Syria. Ash Sheik Hasan.                                                                          | Middle East       |                                         |
| PI 652351  | <i>D. carota</i> subsp. <i>carota</i>                                                | Wild | Turkey. Izmir: Near Cesme.                                                                       | Middle East       |                                         |
| Ames 30219 | <i>D. carota</i> subsp. <i>carota</i> x <i>D. carota</i> subsp. <i>capillifolius</i> | Wild | Tunisia. Sidi Bouzid: along road to Sidi Bouzid (Route 125), north of Bir El Hfey, at El M'Zara. | North Africa      |                                         |
| Ames 30253 | <i>D. carota</i> subsp. <i>carota</i> x <i>D. carota</i> subsp. <i>capillifolius</i> | Wild | Tunisia. Nabuel: Between El Haouarcae and Dor Allouche.                                          | North Africa      |                                         |
| Ames 30255 | <i>D. carota</i> subsp. <i>carota</i> x <i>D. carota</i> subsp. <i>capillifolius</i> | Wild | Tunisia. Nabuel: along road between Korba and Beni Khalled.                                      | North Africa      |                                         |
| Ames 7674  | <i>D. carota</i> subsp. <i>commutatus</i> (Paol.) Thell.                             | Wild | Italy. Tuscany (Botanic Garden).                                                                 | Europe            | <i>D. carota</i> subsp. <i>gummifer</i> |
| PI 478883  | <i>D. carota</i> subsp. <i>commutatus</i>                                            | Wild | France. Finistere: maritime turf, Le Conquet.                                                    | Europe            | <i>D. carota</i> subsp. <i>gummifer</i> |
| Ames 26381 | <i>D. carota</i> subsp. <i>fontanesii</i> Thell.                                     | Wild | Portugal. Faro: Near Portimao.                                                                   | Iberian Peninsula | <i>D. carota</i> subsp. <i>gummifer</i> |
| Ames 31193 | <i>D. carota</i> subsp. <i>gadecaei</i> (Rouy & E. G. Camus) Heywood                 | Wild | France.                                                                                          | Europe            | <i>D. carota</i> subsp. <i>gummifer</i> |
| Ames 26382 | <i>D. carota</i> subsp. <i>gummifer</i> (Syme) Hook. f.                              | Wild | Portugal. Faro: Near Sagres.                                                                     | Iberian Peninsula |                                         |
| Ames 26383 | <i>D. carota</i> subsp. <i>gummifer</i>                                              | Wild | Portugal. Faro: Near Aljezur.                                                                    | Iberian Peninsula |                                         |
| Ames 26384 | <i>D. carota</i> subsp. <i>gummifer</i>                                              | Wild | Portugal. Beja: Near Cavaleiro                                                                   | Iberian Peninsula |                                         |
| PI 652411  | <i>D. carota</i> subsp. <i>gummifer</i>                                              | Wild | France. Finistere: Pointe de Rospico, Navez.                                                     | Europe            |                                         |
| Ames 25898 | <i>D. guttatus</i> Sm. (20) +                                                        | Wild | Turkey. Konya: Konya, toward Beysehir.                                                           |                   |                                         |
| PI 286611  | <i>D. guttatus</i> +                                                                 | Wild | Source: Lebanon. American University of Beirut: Faculty of Agricultural Sciences.                |                   |                                         |
| PI 652387  | <i>D. guttatus</i> +                                                                 | Wild | Turkey. Antalya.                                                                                 |                   |                                         |

|            |                                                                       |          |                                                                                    |                      |                                         |
|------------|-----------------------------------------------------------------------|----------|------------------------------------------------------------------------------------|----------------------|-----------------------------------------|
| Ames 31194 | <i>D. carota</i> subsp.<br><i>halophilus</i><br>(Brot.) A.<br>Pujadas | Wild     | Unknown                                                                            | Iberian<br>Peninsula | <i>D. carota</i> subsp. <i>gummifer</i> |
| Ames 24682 | <i>D. carota</i> subsp.<br><i>major</i> (Vis.)<br>Arcang.             | Wild     | Portugal. Coimbra: Souselas.                                                       | Iberian<br>Peninsula | <i>D. carota</i> subsp. <i>carota</i>   |
| Ames 25017 | <i>D. carota</i> subsp.<br><i>major</i>                               | Wild     | Germany. Saxony-Anhalt.                                                            | Europe               | <i>D. carota</i> subsp. <i>carota</i>   |
| PI 652229  | <i>D. carota</i> subsp.<br><i>major</i>                               | Wild     | Tunisia. Aryanah (Institut<br>National de la Recherche<br>Agronomique de Tunisie). | North<br>Africa      | <i>D. carota</i> subsp. <i>carota</i>   |
| Ames 26391 | <i>D. carota</i> subsp.<br><i>maritimus</i> (Lam.)<br>Batt.           | Wild     | Portugal. Coimbra: Near<br>Buarcos.                                                | Iberian<br>Peninsula | <i>D. carota</i> subsp. <i>carota</i>   |
| Ames 26392 | <i>D. carota</i> subsp.<br><i>maritimus</i>                           | Wild     | Portugal. Leiria: Near<br>Batalha.                                                 | Iberian<br>Peninsula | <i>D. carota</i> subsp. <i>carota</i>   |
| Ames 26393 | <i>D. carota</i> subsp.<br><i>maritimus</i>                           | Wild     | Portugal. Castelo Branco:<br>Near Perdiagao                                        | Iberian<br>Peninsula | <i>D. carota</i> subsp. <i>carota</i>   |
| Ames 26394 | <i>D. carota</i> subsp.<br><i>maritimus</i>                           | Wild     | Portugal. Portalegre near<br>Monforte.                                             | Iberian<br>Peninsula | <i>D. carota</i> subsp. <i>maximus</i>  |
| Ames 26390 | <i>D. carota</i> subsp.<br><i>maritimus</i>                           | Wild     | Portugal. Coimbra: Near<br>Mesura.                                                 | Iberian<br>Peninsula | <i>D. carota</i> subsp. <i>carota</i>   |
| PI 502244  | <i>D. carota</i> subsp.<br><i>maritimus</i>                           | Wild     | Portugal. Coimbra: Lousa.                                                          | Iberian<br>Peninsula | <i>D. carota</i> subsp. <i>carota</i>   |
| PI 652225  | <i>D. carota</i> subsp.<br><i>maritimus</i>                           | Landrace | France. Paris (Museum<br>National d'Histoire<br>Naturelle).                        |                      | <i>D. carota</i> subsp. <i>sativus</i>  |
| Ames 26402 | <i>D. carota</i> subsp.<br><i>maximus</i> (Desf.)<br>Ball             | Wild     | Portugal. Portalegre: Near<br>Sao Vicente e Ventosa.                               | Iberian<br>Peninsula |                                         |
| Ames 26407 | <i>D. carota</i> subsp.<br><i>maximus</i>                             | Wild     | Portugal. Faro: Near Olhao.                                                        | Iberian<br>Peninsula |                                         |
| Ames 26408 | <i>D. carota</i> subsp.<br><i>maximus</i>                             | Wild     | Portugal. Beja: Near Monte<br>Velho.                                               | Iberian<br>Peninsula |                                         |
| Ames 26401 | <i>D. carota</i> subsp.<br><i>maximus</i>                             | Wild     | Portugal. Portalegre: Near<br>Monforte.                                            | Iberian<br>Peninsula |                                         |
| PI 652230  | <i>D. carota</i> subsp.<br><i>maximus</i>                             | Wild     | Albania. Lushnjë: Along road<br>going to field plots of Wheat<br>Institute.        | Balkan<br>Peninsula  | <i>D. carota</i> subsp. <i>carota</i>   |
| PI 279777  | <i>D. carota</i> subsp.<br><i>sativus</i> (Hoffm.)<br>Schubl. & G.    | Landrace | Egypt. Giza (Orman Botanic<br>Garden.).                                            |                      |                                         |



|            |                                                   | Martens    |                                                                                       |  |                    |
|------------|---------------------------------------------------|------------|---------------------------------------------------------------------------------------|--|--------------------|
| PI 432900  | <i>D. carota</i> subsp.<br><i>sativus</i>         | Cultivated | China.                                                                                |  | Eastern            |
| PI 432901  | <i>D. carota</i> subsp.<br><i>sativus</i>         | Cultivated | China.                                                                                |  | Eastern            |
| PI 451752  | <i>D. carota</i> subsp.<br><i>sativus</i>         | Cultivated | Netherlands.                                                                          |  | Western            |
| PI 509434  | <i>D. carota</i> subsp.<br><i>sativus</i>         | Cultivated | Turkey. Sivas.                                                                        |  | Eastern            |
| PI 652152  | <i>D. carota</i> subsp.<br><i>sativus</i>         | Cultivated | United Kingdom.                                                                       |  | Western            |
| PI 652155  | <i>D. carota</i> subsp.<br><i>sativus</i>         | Cultivated | Hungary. Pest.                                                                        |  | Western            |
| PI 652414  | <i>D. crinitus</i><br>Desf. (22) +                | Wild       | Portugal. Faro: Near Bengado.                                                         |  |                    |
| PI 652355  | <i>D. involucratus</i><br>Sm. (22) +              | Wild       | Turkey. Izmir: 5 km north of<br>Kusadasi.                                             |  |                    |
| PI 295857  | <i>D. littoralis</i><br>Sibth. & Sm.<br>(20) +    | Wild       | Israel. Beit Alpha.                                                                   |  |                    |
| PI 661242  | <i>D. pusillus</i><br>Michx. (22) +               | Wild       | USA. Oregon: near Hunters<br>River Cove, Curry.                                       |  |                    |
| Ames 29096 | <i>D. sahariensis</i><br>Murb. (18)               | Wild       | Tunisia.                                                                              |  | <i>D. syrticus</i> |
| Ames 29097 | <i>D. sahariensis</i>                             | Wild       | Tunisia.                                                                              |  | <i>D. syrticus</i> |
| Ames 29098 | <i>D. sahariensis</i>                             | Wild       | Tunisia.                                                                              |  | <i>D. syrticus</i> |
| PI 652329  | <i>D. setulosus</i><br>Guss. (not<br>reported) +  | Wild       | Greece. Peloponnese: 4 km<br>from Skoura, toward<br>Leonidion, Laconia<br>Prefecture. |  |                    |
| Ames 29108 | <i>D. syrticus</i><br>Murb. (18)                  | Wild       | Tunisia.                                                                              |  |                    |
| Ames 29109 | <i>D. syrticus</i>                                | Wild       | Tunisia.                                                                              |  |                    |
| Ames 29110 | <i>D. syrticus</i>                                | Wild       | Tunisia.                                                                              |  |                    |
| PI 649477  | <i>Orlaya daucoides</i><br>(L.) Greuter<br>(20) + | Wild       | Turkey. Aydin: Dilek<br>Peninsula Reserve.                                            |  |                    |
| PI 674284  | <i>Rouya polygama</i><br>(Desf.) Coincy<br>(20) + | Wild       | Tunisia. Jendouba: Road to<br>Tabarka, near Tabarka<br>airport.                       |  |                    |

<sup>a</sup> Plant Introduction (PI) numbers are permanent numbers designated to germplasm accessions maintained at the

---

National Plant Germplasm System (NPGS) in Ames, Iowa, USA. Ames numbers are assigned for carrots and other Apiaceae in the NPGS temporarily to newly acquired germplasm until passport data of an accession and taxonomy is verified. Also, accessions with Ames numbers have to be determined they are not duplicate accessions, and that they can be successfully maintained by the USDA. It is not guaranteed these accessions may be assigned a PI number after the assessment period.

<sup>b</sup> These names correspond to those in the Germplasm Resources Information Network (GRIN) database (<https://npgsweb.ars-grin.gov/gringlobal/search.aspx?>). The 14 accessions designated with a plus sign were used to demonstrate the utility of GBS data to obtain the dominant topology of *Daucus* (Arbizu et al. [36]).

<sup>c</sup> Location refers to where the germplasm was collected in the wild. If the accession was obtained through another entity (vendor, genebank, botanic garden), the source is indicated within parenthesis.
