# Supplementary material for: Genotyping-by-sequencing provides the discriminating power to investigate the subspecies of Daucus carota (Apiaceae)
Source: PubMed Central journal article supplement (PMC5084430; doi:10.1186/s12862-016-0806-x), 2016-10-28
Supplement: 12862_2016_806_MOESM3_ESM.pdf [file 12862_2016_806_MOESM3_ESM.pdf]

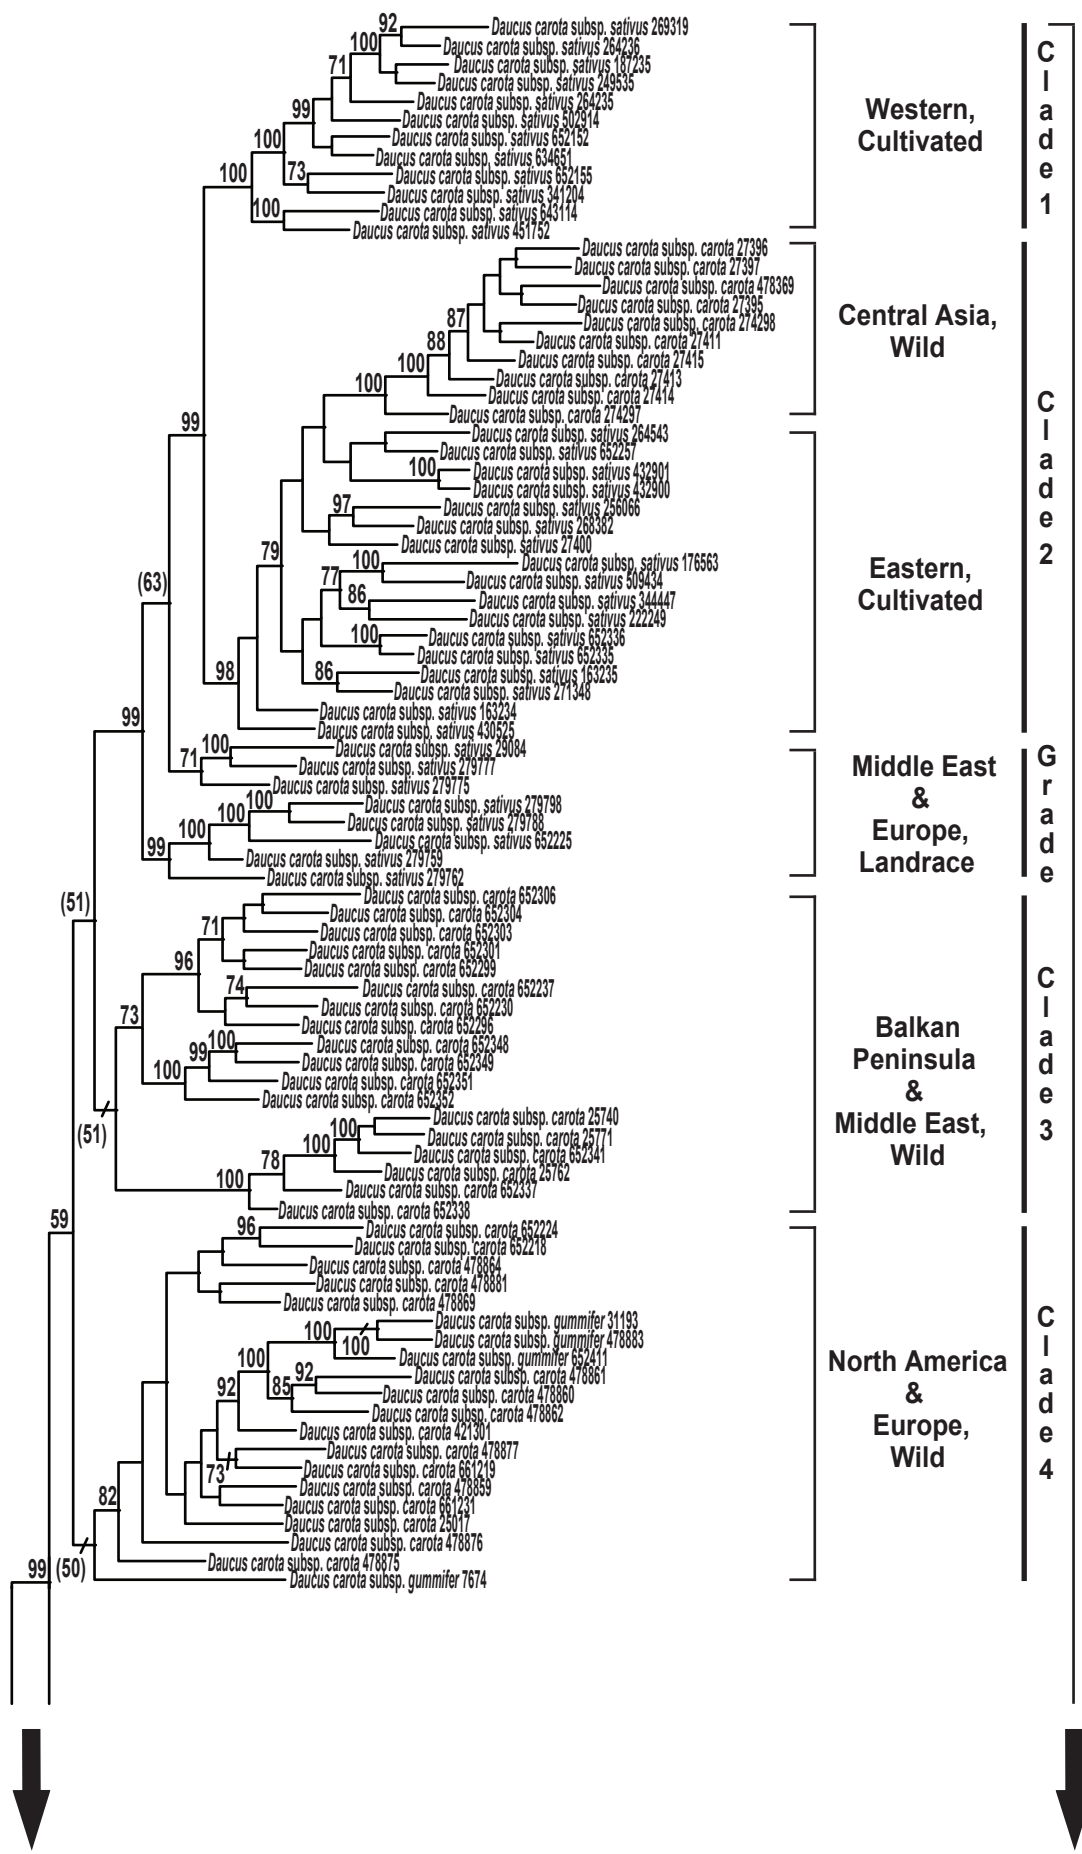

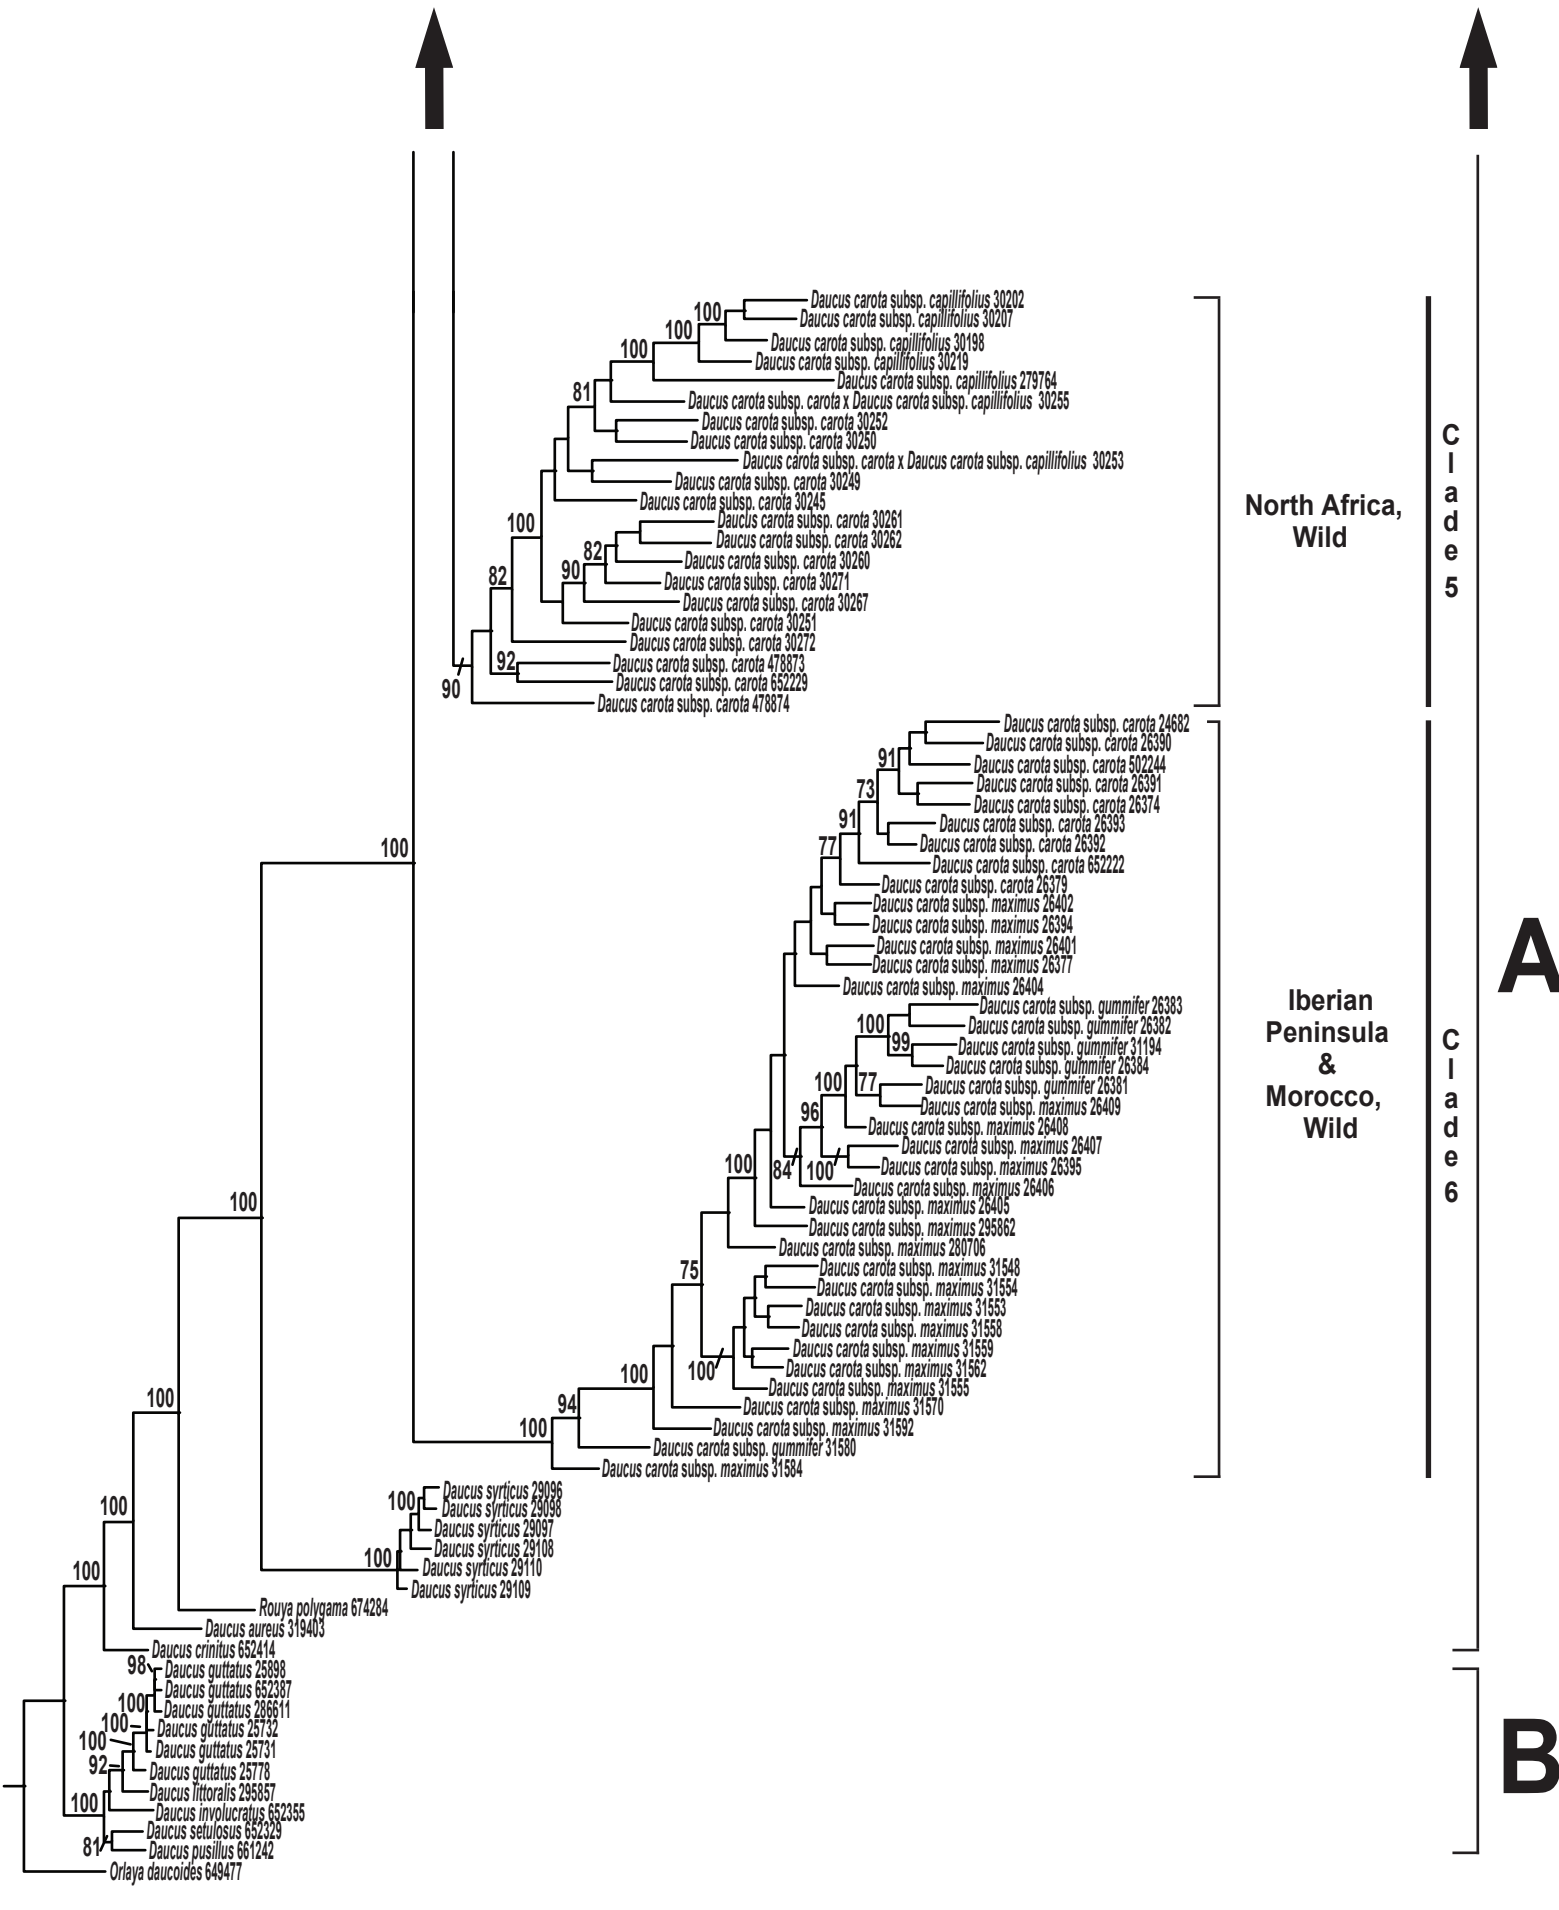

0.1

A

B
