# Supplementary material for: Genotyping-by-sequencing provides the discriminating power to investigate the subspecies of Daucus carota (Apiaceae)
Source: PubMed Central journal article supplement (PMC5084430; doi:10.1186/s12862-016-0806-x), 2016-10-28
Supplement: 12862_2016_806_MOESM6_ESM.pdf [file 12862_2016_806_MOESM6_ESM.pdf]

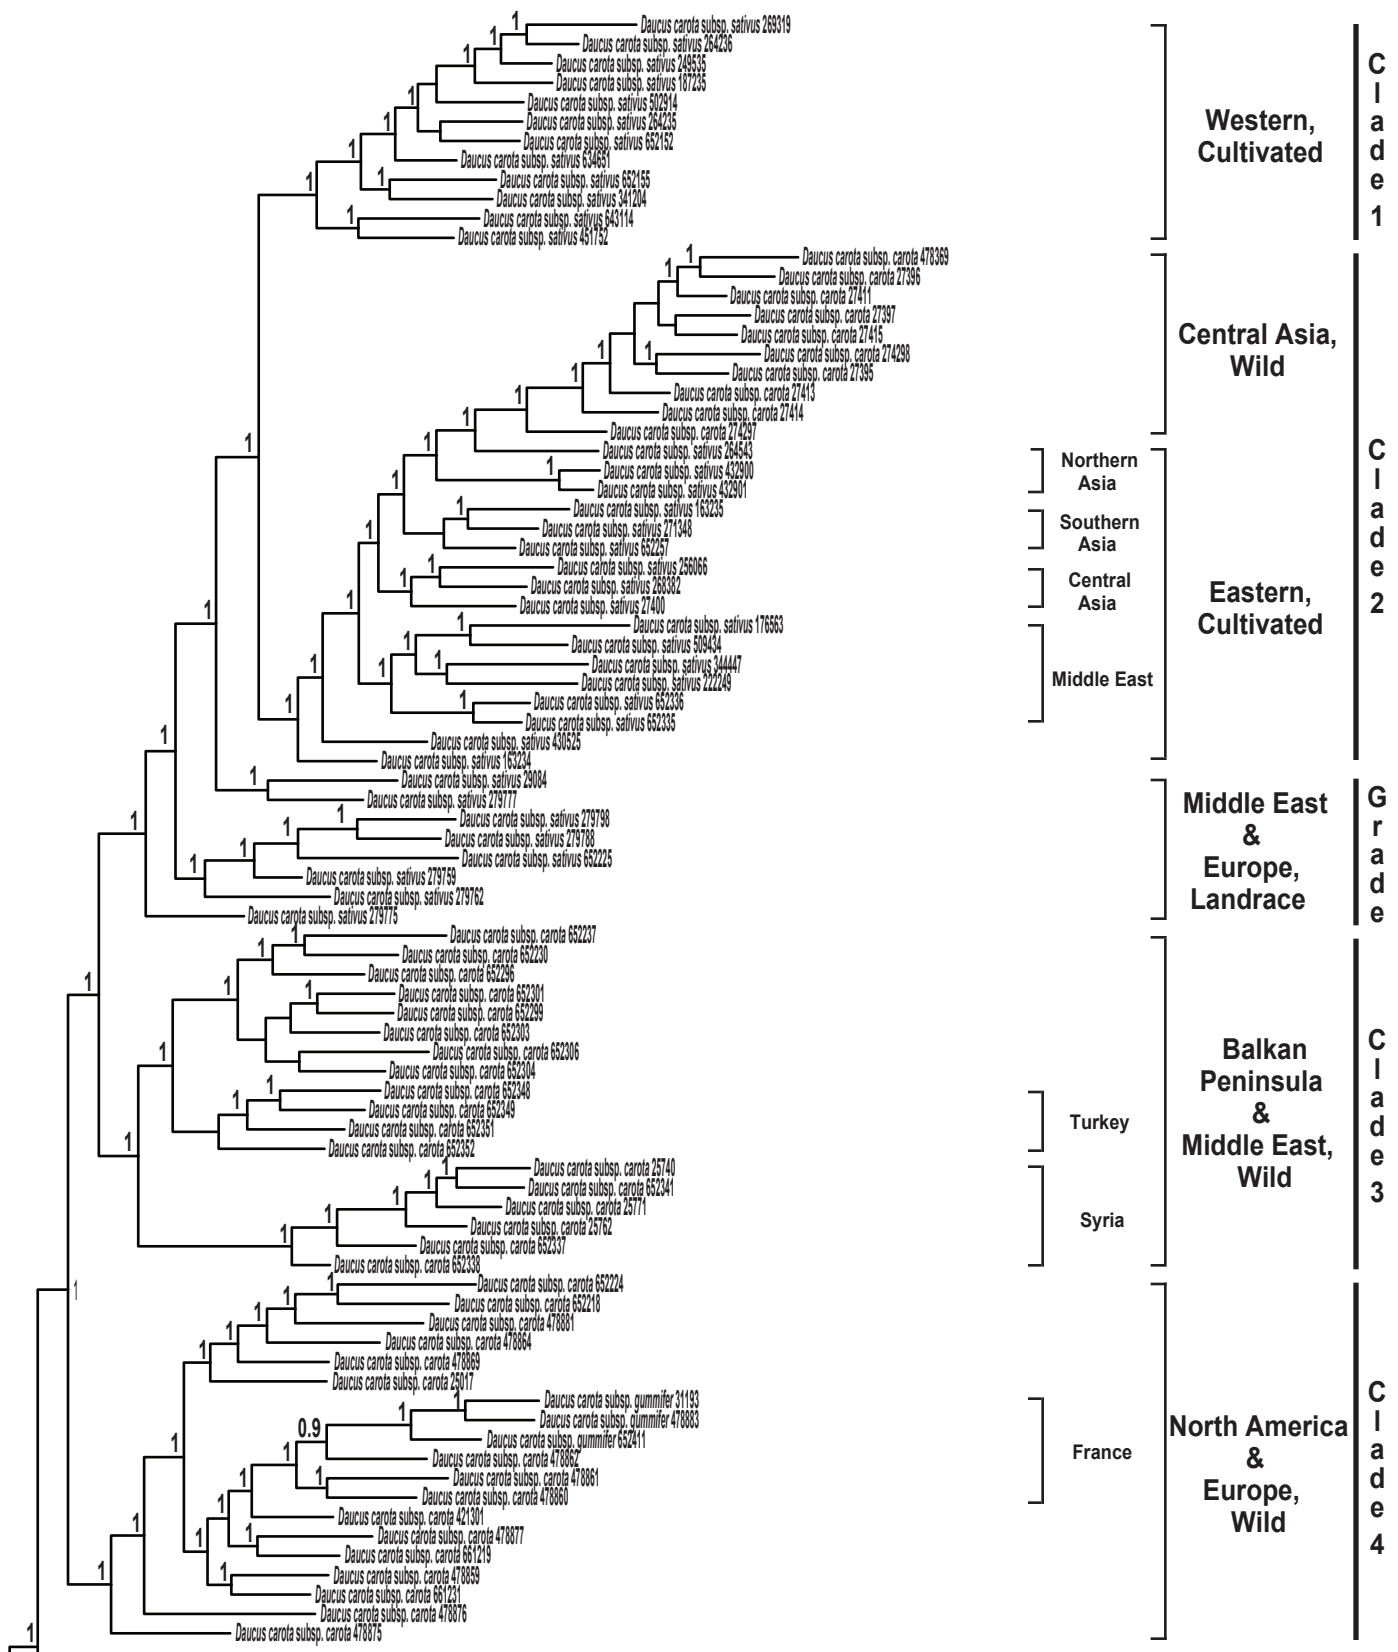

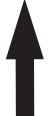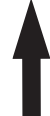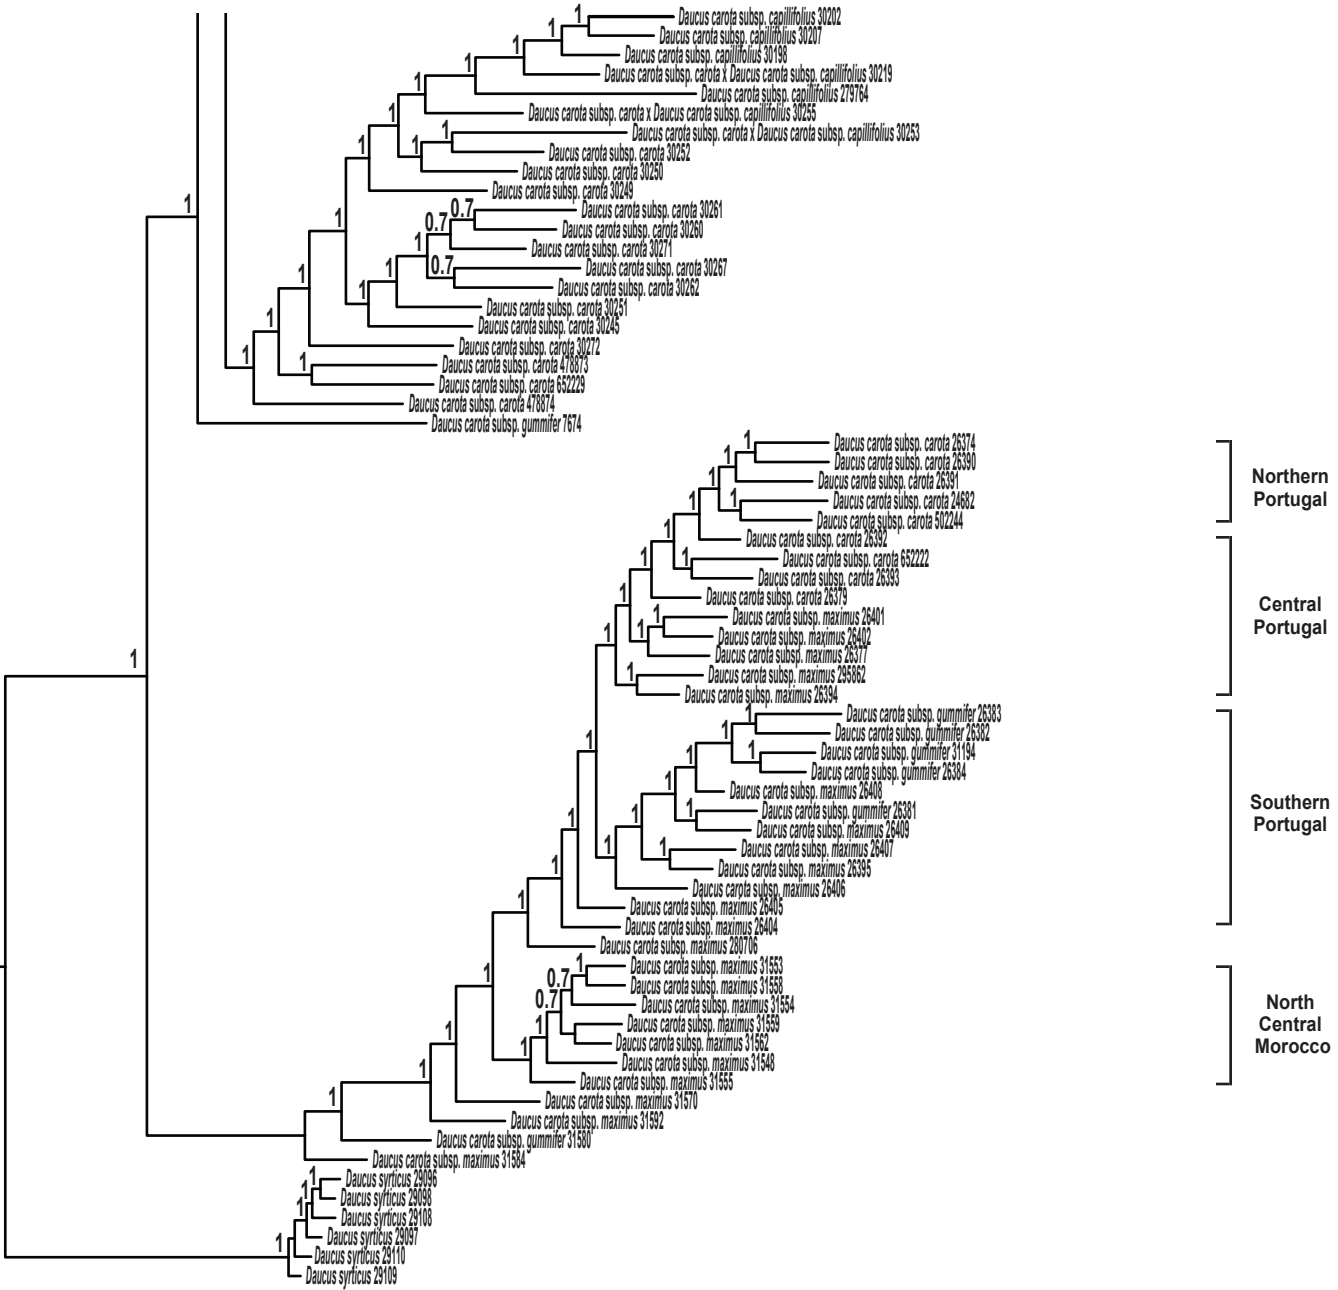

North Africa,  
Wild

C l a d e 5

Northern  
Portugal

Central  
Portugal

Iberian  
Peninsula  
&  
Morocco,  
Wild

C l a d e 6

Southern  
Portugal

North  
Central  
Morocco

Outgroup

0.1
